# Supplementary material for: Mixed methods pilot study of a low-carbohydrate diabetes prevention programme among adults with pre-diabetes in the USA
Source: PubMed Central journal article supplement — BMJ Open. 2020 Jan 21;10(1):e033397. doi: 10.1136/bmjopen-2019-033397 (PMC7045213; doi:10.1136/bmjopen-2019-033397), 2020-01-21
Supplement: bmjopen-2019-033397.draft_revisions.pdf [file bmjopen-2019-033397.draft_revisions.pdf]

# BMJ Open

BMJ Open is committed to open peer review. As part of this commitment we make the peer review history of every article we publish publicly available.

When an article is published we post the peer reviewers' comments and the authors' responses online. We also post the versions of the paper that were used during peer review. These are the versions that the peer review comments apply to.

The versions of the paper that follow are the versions that were submitted during the peer review process. They are not the versions of record or the final published versions. They should not be cited or distributed as the published version of this manuscript.

BMJ Open is an open access journal and the full, final, typeset and author-corrected version of record of the manuscript is available on our site with no access controls, subscription charges or pay-per-view fees (<http://bmjopen.bmj.com>).

If you have any questions on BMJ Open's open peer review process please email [info.bmjopen@bmj.com](mailto:info.bmjopen@bmj.com)

# BMJ Open

## A Mixed Methods Pilot Study of a Low-Carbohydrate Diabetes Prevention Program Among Adults with Prediabetes

|                               |                                                                                                                                                                                                                                                                                                                                                                                                                                                                                                                                                                                                       |
|-------------------------------|-------------------------------------------------------------------------------------------------------------------------------------------------------------------------------------------------------------------------------------------------------------------------------------------------------------------------------------------------------------------------------------------------------------------------------------------------------------------------------------------------------------------------------------------------------------------------------------------------------|
| Journal:                      | <i>BMJ Open</i>                                                                                                                                                                                                                                                                                                                                                                                                                                                                                                                                                                                       |
| Manuscript ID                 | bmjopen-2019-033397                                                                                                                                                                                                                                                                                                                                                                                                                                                                                                                                                                                   |
| Article Type:                 | Original research                                                                                                                                                                                                                                                                                                                                                                                                                                                                                                                                                                                     |
| Date Submitted by the Author: | 02-Aug-2019                                                                                                                                                                                                                                                                                                                                                                                                                                                                                                                                                                                           |
| Complete List of Authors:     | Griauzde, Dina; VA Ann Arbor Healthcare System; University of Michigan Medical School<br>Saslow, Laura; University of Michigan School of Nursing<br>Patterson, Kaitlyn; University of Michigan Medical School<br>Ansari, Tahoorah; University of Michigan School of Public Health<br>Liestenfeltz, Bradley; University of Michigan School of Nursing<br>Tisack, Aaron; Wayne State University School of Medicine<br>Bihn, Patti; National Kidney Foundation of Michigan<br>Shopinski, Samuel; National Kidney Foundation of Michigan<br>Richardson, Caroline R; University of Michigan Medical School |
| Keywords:                     | NUTRITION & DIETETICS, DIABETES & ENDOCRINOLOGY, PREVENTIVE MEDICINE                                                                                                                                                                                                                                                                                                                                                                                                                                                                                                                                  |
|                               |                                                                                                                                                                                                                                                                                                                                                                                                                                                                                                                                                                                                       |

SCHOLARONE™  
Manuscripts

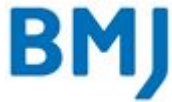

I, the Submitting Author has the right to grant and does grant on behalf of all authors of the Work (as defined in the below author licence), an exclusive licence and/or a non-exclusive licence for contributions from authors who are: i) UK Crown employees; ii) where BMJ has agreed a CC-BY licence shall apply, and/or iii) in accordance with the terms applicable for US Federal Government officers or employees acting as part of their official duties; on a worldwide, perpetual, irrevocable, royalty-free basis to BMJ Publishing Group Ltd ("BMJ") its licensees and where the relevant Journal is co-owned by BMJ to the co-owners of the Journal, to publish the Work in this journal and any other BMJ products and to exploit all rights, as set out in our [licence](#).

The Submitting Author accepts and understands that any supply made under these terms is made by BMJ to the Submitting Author unless you are acting as an employee on behalf of your employer or a postgraduate student of an affiliated institution which is paying any applicable article publishing charge ("APC") for Open Access articles. Where the Submitting Author wishes to make the Work available on an Open Access basis (and intends to pay the relevant APC), the terms of reuse of such Open Access shall be governed by a Creative Commons licence – details of these licences and which [Creative Commons](#) licence will apply to this Work are set out in our licence referred to above.

Other than as permitted in any relevant BMJ Author's Self Archiving Policies, I confirm this Work has not been accepted for publication elsewhere, is not being considered for publication elsewhere and does not duplicate material already published. I confirm all authors consent to publication of this Work and authorise the granting of this licence.

1  
2  
3 **A Mixed Methods Pilot Study of a Low-Carbohydrate Diabetes Prevention Program Among Adults**  
4 **with Prediabetes**  
5  
6

7 Dina Hafez Griauzde<sup>1,2,3</sup>, MD, MSc; Laura Saslow<sup>3,4</sup>, PhD; Kaitlyn Patterson<sup>2</sup>, BS; Tahoorah Ansari<sup>5</sup>,  
8 MPH; Brad Liestenfeltz<sup>4</sup>, BSN, RN; Aaron Tisack<sup>6</sup>, BS; Patti Bihn<sup>7</sup>, BSN, RN; Samuel Shopinski<sup>7</sup>,  
9 MMS; Caroline R. Richardson<sup>2,3</sup>, MD  
10  
11  
12  
13

14 <sup>1</sup>VA Ann Arbor Healthcare System, Ann Arbor, MI, USA  
15

16 <sup>2</sup>University of Michigan Medical School, Ann Arbor, MI, USA  
17

18 <sup>3</sup>University of Michigan Institute for Healthcare Policy and Innovation, Ann Arbor, MI, USA  
19

20 <sup>4</sup>University of Michigan School of Nursing, Ann Arbor, MI, USA  
21

22 <sup>5</sup>University of Michigan School of Public Health, Ann Arbor, MI, USA  
23

24 <sup>6</sup>Wayne State University School of Medicine, Detroit, MI, USA  
25

26 <sup>7</sup>National Kidney Foundation of Michigan, Ann Arbor, MI, USA  
27  
28

29 **Corresponding Author:**

30 Dina H. Griauzde MD, MSc  
31

32 2800 Plymouth Road, Building 16, Room 16-371C  
33

34 Ann Arbor, MI 48109-2800  
35

36 Phone: 603-860-1066  
37

38 Email: dhafez@med.umich.edu  
39  
40

41 Word count: 3822  
42

43 Tables: 3  
44

45 Figures: 0  
46  
47  
48  
49  
50  
51  
52  
53  
54  
55  
56  
57  
58  
59  
60

**ABSTRACT**

**Objective:** (1) To evaluate the feasibility and acceptability of a Low-Carbohydrate Diabetes Prevention Program (LC-DPP) among adults with prediabetes; (2) To estimate weight loss from a LC-DPP.

**Research Design and Methods:** Single-arm mixed methods pilot study. We adapted the Center for Disease Control and Prevention's National Diabetes Prevention Program to teach participants to follow a very low-carbohydrate diet (VLCD). We recruited adults with body mass index  $\geq 25$  kg/m<sup>2</sup> and prediabetes from one primary care clinic. Primary outcome measures were feasibility (e.g., enrollment, retention as measured by rates of survey completion) and acceptability (e.g., session attendance, qualitative feedback). Secondary outcome measures included change in weight and achievement of  $\geq 5\%$  weight loss. During semi-structured interviews, we explored facilitators of and barriers to VLCD adherence.

**Results:** 22/187 individuals (12%) enrolled. One person dropped out before a baseline weight was obtained; data from 21 individuals were analyzed. Fifteen individuals (71%) completed the 12-month survey. On average, participants attended 10.3/16 core sessions and 3.4/7 maintenance sessions. Mean (SD) percent weight change was 4.5 (5.0) at 6 months and 5.2 (6.0) at 12 months; 8/21 individuals (38%) achieved  $\geq 5\%$  weight loss at 12 months. Weight change was greater among survey completers (n=15) as compared to survey non-completers at 6 months (6.2% versus 4.5%) and 12 months (6.4% vs. 5.2%). Among interviewees (n=14), 3 factors facilitated VLCD adherence: (1) enjoyment of low-carbohydrate foods; (2) diminished hunger and cravings; and (3) health benefits beyond weight loss. Three factors hindered VLCD adherence: (1) enjoyment of high-carbohydrate foods; (2) lack of social support; and (3) difficulty pre-planning meals.

**Conclusions:** A LC-DPP is feasible, acceptable, and may be effective for weight loss among adults with prediabetes.

**Strengths and Limitations**

- This is the first study to explore a dietary strategy to augment the weight loss effectiveness of the Center for Disease Control and Prevention's National Diabetes Prevention Program (NDPP).
- A Low-Carbohydrate Diabetes Prevention Program (LC-DPP) was feasible and acceptable among participants.
- Mean weight loss among LC-DPP participants was greater than mean weight loss among historical NDPP controls.
- This was a single-arm pilot study.
- Outcomes beyond 12 months were not examined.

## INTRODUCTION

1  
2  
3  
4  
5  
6 An estimated 84 million U.S. adults have prediabetes and face an elevated risk of developing  
7  
8 T2DM (1). Fortunately, individuals with prediabetes can prevent progression to T2DM. The landmark  
9  
10 Diabetes Prevention Program (DPP) Trial demonstrated a 58 percent reduction in the 3-year incidence of  
11  
12 T2DM among individuals with prediabetes who achieved at least 7 percent body weight loss through diet  
13  
14 and physical activity changes (2). Accordingly, the Centers for Disease Control and Prevention (CDC)  
15  
16 adapted the DPP's individual lifestyle intervention to a group-based program, which is now available in  
17  
18 communities across the United States (3,4) and covered by a growing number of health plans, including  
19  
20 Medicare (5).  
21

22  
23 Although the DPP is the prevailing public health strategy for T2DM, rates of program uptake and  
24  
25 engagement are very low (6–8) and only 35% of real-world DPP participants achieve goal weight loss of  
26  
27 at least 5% (4). A variety of efforts aim to augment DPP uptake and engagement, including public health  
28  
29 campaigns to increase individuals' prediabetes risk awareness (9), initiatives to encourage primary care  
30  
31 providers to identify and treat patients with prediabetes (10), and online and mobile health program  
32  
33 adaptations to accommodate differences in individuals' needs and preferences (11). In contrast, no  
34  
35 efforts, to our knowledge, specifically aim to increase the DPP's weight-loss effectiveness. Yet, doing so  
36  
37 is critical, as weight loss is the key driver of T2DM risk reduction (12), and insurance payment hinges, in  
38  
39 part, on participants' achievement and maintenance of at least 5% body weight loss (5).  
40

41  
42 One promising strategy to increase the DPP's weight loss effectiveness may be to change the  
43  
44 program's dietary advice. The DPP was developed in the 1990s and thus teaches individuals to follow a  
45  
46 low-fat, calorie-restricted diet, as this was the contemporaneous recommendation for healthy eating (15).  
47  
48 However, the scientific merit of this recommendation has been criticized (15). Growing evidence  
49  
50 supports the efficacy of low-carbohydrate diets (defined <26% total energy from carbohydrate per day)  
51  
52 and VLCDs (defined as <10% of total energy from carbohydrate per day) (16) for short-term weight loss  
53  
54  
55  
56  
57  
58  
59  
60

1  
2  
3 (17–19), long-term weight maintenance (20–22), and improved glycemic control, particularly among  
4 individuals with T2DM and insulin resistance (16,23,24).  
5  
6

7 Several prior studies have effectively used VLCDs to promote weight loss among patients with  
8 prediabetes (25,26). However, these interventions are costly and often require specialty care, which limit  
9 their ability to be scaled. In contrast, the NDPP uses non-medical coaches to deliver the program in a  
10 variety of community-based settings (27). Accordingly, we hypothesized that a low-carbohydrate  
11 Diabetes Prevention Program (LC-DPP) may be better for weight loss and T2DM prevention than the  
12 traditional, low-fat DPP, and, if effective, a LC-DPP could be readily scaled using lay educators and  
13 existing DPP infrastructure and systems for monitoring and ensuring program fidelity (28). This mixed  
14 methods pilot study has two aims: (1) to test the feasibility (e.g., enrollment and retention rates) and  
15 acceptability (e.g., session attendance, qualitative feedback) of a LC-DPP; and (2) to estimate weight loss  
16 from the intervention.  
17  
18  
19  
20  
21  
22  
23  
24  
25  
26  
27

## 28 **METHODS**

29  
30 We conducted a single-arm pilot study to test the acceptability, feasibility and preliminary  
31 efficacy on weight loss of a LC-DPP among individuals with prediabetes (clinical trial reg. no.  
32 NCT03258918, ClinicalTrials.gov). The study was approved by the University of Michigan Institutional  
33 Review Board and conducted from August 2017 to October 2018. We used a mixed methods intervention  
34 design with quantitative data collected at baseline, 6-months, and 12-months and semi-structured  
35 interviews conducted at 6-months and 12-months. The purpose of embedded qualitative interviews was to  
36 better understand participants' experiences with the intervention and to help explain our quantitative  
37 findings (29) .  
38  
39  
40  
41  
42  
43  
44  
45  
46

### 47 *Setting and Participants*

48  
49 Individuals were recruited from one Michigan Medicine primary care clinic. Inclusion criteria  
50 were: (1) overweight, defined as body mass index (BMI)  $\geq 25$  kg/m<sup>2</sup> (30); (2) hemoglobin A1c (HbA1c)  
51 between 5.7-6.4% drawn within 6 months of the study start date; (3) willingness to participate in group-  
52 based classes; and (4) able to engage in at least light physical activity. Exclusion criteria were: (1) history  
53  
54  
55  
56  
57  
58  
59  
60



1  
2  
3 of type 1 diabetes or type 2 diabetes; (2) current participation in another lifestyle or behavior change  
4 program or research study; (3) following a vegetarian or vegan dietary pattern; (4) inability to read, write,  
5 or speak English; (5) inability to provide informed consent; or (6) pregnant or intention to become  
6 pregnant during the intervention period. We used an Electronic Health Record (EHR) reporting tool to  
7 identify individuals who met study eligibility criteria. A study invitation letter was sent to 187  
8 individuals. Individuals interested in study participation emailed the study team and were then screened  
9 by telephone to ensure they met study eligibility criteria. Informed consent was obtained electronically  
10 using RedCap, a secure survey platform (31).

### 11 12 13 14 15 16 17 18 19 20 *Intervention*

21  
22 The CDC offers two approved DPP curricula: (1) 2012 National Diabetes Prevention Program  
23 (NDPP) and (2) *Prevent T2* (28). While *Prevent T2* is a newer program iteration, it has not been  
24 evaluated in peer-reviewed literature (4) and its effectiveness as compared to the 2012 NDPP is unknown.  
25 To facilitate comparison between our LC-DPP and published data on community-based DPPs, we  
26 modified the CDC's NDPP rather than *Prevent T2*.  
27  
28  
29  
30  
31

32 The NDPP curriculum consists of 16-weekly sessions delivered over 6 months (i.e., core phase)  
33 followed by 6-8 bimonthly or monthly sessions (i.e., maintenance phase). In addition to teaching  
34 participants to follow a low-fat diet, the program also instructs individuals to engage in at least 150  
35 minutes of moderate intensity physical activity per week and to use behavioral strategies (e.g., problem  
36 solving) to maintain lifestyle changes over time.  
37  
38  
39  
40  
41  
42

43 We adapted the NDPP's dietary advice to teach participants to follow a VLCD, restricting  
44 carbohydrate intake (not including fiber) to 20-35 grams per day during the program's core phase.  
45 Allowable foods included: meats, fish, poultry, eggs, cheese, seeds, nuts, leafy greens, non-starchy  
46 vegetables, and some fruits (e.g., berries). Participants were also taught to use low-carbohydrate  
47 substitutes when cooking or baking (e.g., almond flour in place of wheat flour). To minimize potential  
48 side effects (e.g. headache, constipation, muscle cramps, diarrhea, general weakness) participants were  
49 instructed to replace one meal a week with a low-carbohydrate alternative, starting with breakfast and  
50  
51  
52  
53  
54  
55  
56  
57  
58  
59  
60

1  
2  
3 snacks. During the LC-DPP's maintenance phase, participants were instructed to gradually reintroduce  
4 carbohydrates (e.g., 5 non-fiber grams of carbohydrates per week) if: (1) they had met their weight loss  
5 target and (2) if they desired to liberalize their carbohydrate intake. Consistent with NDPP operating  
6 procedures, LC-DPP participants were asked to maintain daily food logs; these were submitted to the  
7 lifestyle coach at each session and then returned to participants with written feedback on food choices at  
8 the following session.  
9  
10  
11  
12  
13  
14

15  
16 We partnered with the National Kidney Foundation of Michigan (NKFM), a local leader in  
17 community-based NDPP delivery. We trained an experienced NKFM lifestyle coach to deliver the LC-  
18 DPP. Training consisted of: (1) the coach's self-guided review of LC-DPP materials and online low-  
19 carbohydrate resources; (2) in-person training with the coach and study team, totaling approximately 4  
20 hours; and (3) assessment of the coach's low-carbohydrate knowledge using a 22-item survey (Appendix  
21 1). During the training period, our coach adapted her personal eating habits to adhere to a low-  
22 carbohydrate meal plan; she continued this eating pattern throughout the study period.  
23  
24  
25  
26  
27  
28  
29

30  
31 Participants' primary care physicians (PCPs) were notified via HIPPA-compliant messaging that  
32 their patient(s) was/were participating in this study. PCPs received written material about the study as  
33 well as potential side effects of low-carbohydrate diets and management strategies (e.g., magnesium for  
34 muscle cramps).  
35  
36  
37  
38  
39

#### 40 *Primary Measures: Feasibility and Acceptability*

41  
42 Primary outcome measures were feasibility (e.g., uptake and retention rates) and acceptability  
43 (e.g., session attendance, qualitative feedback). LC-DPP uptake rate was defined as the number of  
44 participants recruited to the intervention divided by the total number of individuals invited to participate.  
45 LC-DPP retention rate was determined by calculating the rate of completion of the 6-month and 12-month  
46 surveys. Because some individuals remained engaged in the intervention (e.g., communicated via phone  
47 or email with the coach) despite personal barriers to in-person session attendance, we used survey  
48  
49  
50  
51  
52  
53  
54  
55  
56  
57  
58  
59  
60

1  
2  
3 completion rate rather than a session attendance threshold (e.g., attendance at 9 core sessions) to measure  
4  
5 study retention.  
6

7 Intervention acceptability was determined by calculating the rate of attendance at core and  
8  
9 maintenance sessions. Rates of session attendance were compared with the CDC's Diabetes Prevention  
10  
11 Recognition Program (DPRP) standards (28). The DPRP monitors the fidelity and quality of community-  
12  
13 based DPPs, and requires that at least 60% of program participants attend  $\geq 9$  core sessions and  $\geq 3$  core  
14  
15 sessions. To further understand the program's acceptability, we conducted semi-structured interviews at 6  
16  
17 and 12 months. During interviews, we explored participants' general experiences with the intervention as  
18  
19 well as specific facilitators of and barriers to VLCD adherence.  
20

#### 21 *Secondary Measures:*

22 Change in body weight: Body weight was measured and recorded at each attended session. We calculated  
23  
24 average body weight change and percent body weight loss at the end of the program's core phase (6  
25  
26 months) and maintenance phase (12 months). Among session non-attendees, we attempted to schedule 6-  
27  
28 and 12-month weigh-ins at participants' convenience within 2 weeks of the final core and maintenance  
29  
30 sessions. All weights were obtained using the same calibrated scale.  
31  
32

33 Change in HbA1c: Baseline HbA1c was identified according to study inclusion criteria and abstracted  
34  
35 from the electronic health record (EHR). Primary care physicians were notified that their patient(s)  
36  
37 was/were participating in this intervention and they were asked to order HbA1c at 6 and 12 months.  
38  
39 Change in HbA1c was calculated by subtracting participants' HbA1c at 6 and 12 months from baseline  
40  
41 values.  
42  
43

44 Online Surveys: At baseline, 6 months, and 12 months, study participants were invited to complete an  
45  
46 online survey via RedCap (31). At baseline, participants were asked to provide demographic and  
47  
48 socioeconomic information. In each survey, we assessed participants' experiences of physical symptoms,  
49  
50 which are known to be potential side effects of VLCDs. These include: bad breath, acne, gastrointestinal  
51  
52 symptoms (e.g. constipation, diarrhea), dizziness, dry mouth, excessive thirst, headaches, and muscle  
53  
54  
55  
56  
57  
58  
59

1  
2  
3 cramps. Survey response options were: not at all; 1 day a week; 2-3 days a week; 4-5 days a week; and 6-  
4  
5 7 days a week.

### 6 7 *Analysis*

#### 8 9 10 *Quantitative analysis*

11  
12 Descriptive statistics were used for baseline survey response data including demographic and  
13  
14 socioeconomic characteristics and self-reported side effects. For all continuous outcomes, mean change  
15  
16 and standard deviation from baseline to 6 months and 12 months were calculated. We used paired *t*-tests  
17  
18 to compare self-reported physical symptoms at 6 and 12 months compared to baseline. All analyses were  
19  
20 conducted using Stata 14.  
21  
22

#### 23 24 *Qualitative analysis:*

25  
26 Semi-structured interviews were recorded and transcribed verbatim. Interviews were imported into  
27  
28 qualitative analysis software. Two investigators independently read and coded transcribed interviews.  
29  
30 Interviews were then coded jointly using consensus conferences. Interviews were analyzed using directed  
31  
32 content analysis, meaning the codes were created to reflect the main topics in the interview guide and to  
33  
34 characterize the patterns and themes that emerged from the data (32).  
35  
36

#### 37 38 *Integrated analysis*

39  
40 Integration—the mixing of quantitative and qualitative data (33)—occurred after the study period. We  
41  
42 merged qualitative data with weight loss data to better understand the factors that might have influenced  
43  
44 weight loss outcomes.  
45  
46

47  
48 Patient and public involvement: There was no patient or public involvement with development of this  
49  
50 pilot study. Rather, we sought feedback from study participants. These data will be used to refine the  
51  
52 intervention for a larger-scale trial, which will also be informed by stakeholder groups including patients  
53  
54 with prediabetes, primary care team members, and community partners (e.g., NKFM).  
55  
56  
57  
58  
59  
60

## RESULTS

Intervention uptake: A total of 187 potentially eligible individuals were sent study invitation letters via postal mail. Thirty-two individuals (17%) expressed interest in study participation and 22 (12%) enrolled in the study within two weeks. Reasons for non-enrollment included: unable to reach (n=4); active participation in another weight loss intervention (n=2); unwilling or unable to participant in group classes or follow VLCD (n=3). One person was placed on a waitlist because we met our recruitment target (n=22), which was determined by room-size constraints. One participant dropped out of the study before a baseline weight could be obtained and she was therefore excluded from our analyses.

### Baseline Characteristics

Demographic and socioeconomic characteristics were assessed at baseline (**Table 1**). Most participants were males (57%), white (86%), and educated, with 85% attaining education beyond high school. The mean age was 58.9 years (SD 11.0). At baseline, mean BMI was 34.1 kg/m<sup>2</sup> (SD 5.4) and mean HbA1c level was 5.9% (SD 0.22%).

### Quantitative Analyses:

Retention: Eighteen out of 21 participants completed the 6-month survey and 15 completed the 12-month survey, resulting in a retention rates of 86% and 71%, respectively.

Session attendance: Participants attended a mean (SD) of 10.3 core sessions and 3.4 (2.7) maintenance sessions. Fourteen participants (67%) attended at least 9 core sessions and 11 participants (52%) attended at least 3 maintenance sessions.

Change in weight and HbA1c level: **Table 2** shows weight and HbA1c outcomes at 6 and 12 months among all participants (n=21) and among those who completed the 12-month survey (n=15). No participants progressed to T2DM, defined by HbA1c > 6.4%, during the study period.

Change in self-reported physical symptoms: There were no statistically significant differences in self-reported side effects at 6 or 12 months compared to baseline.

### Adverse Events:

One participant suffered an ischemia stroke during the program's core phase.

## Qualitative Analyses:

### *Participant Experiences with the Intervention*

Fourteen participants participated in semi-structured interviews; 13 participated at 6 months and 12 participated at 12 months. During these interviews, we explored participants' experiences with the program, including barriers to and facilitators of adhering to a low-carbohydrate meal plan. At 12 months, we also explored participants' plans to continue to follow a low-carbohydrate meal-plan. These qualitative data were integrated with interviewees' weight change data to better elucidate factors that may influence participants' weight change.

Over half (n=8, 57%) of interviewees were female. Other baseline characteristics were similar between interviewees and non-interviewees (**Table 1**). At 12 months, mean (SD) percent body weight loss among interviewees was 7.0 (6.5) percent. Half (n=7) of interviewees achieved the program goal of  $\geq 5\%$  body weight loss at 12 months. **Table 3** shows key themes and representative quotes stratified by weight goal achievers and non-achievers.

Among weight goal achievers (n=7), three key themes emerged that facilitated adherence to the low-carbohydrate meal plan: (1) enjoyment of low-carbohydrate foods; (2) diminished hunger; and (3) health benefits beyond weight loss.

The majority of weight goal achievers (n=5) found the meal plan easy to follow due to palatability of the diet and availability of low-carbohydrate substitutes for foods such as potatoes and rice. One participant noted, "In the lunch time, I'll substitute [sandwich bread] with a low-carb wrap. There's a 4-gram wrap that I could use... The only thing you're replacing at dinner time from a carb standpoint would be maybe some potatoes or pastas, and [there are] really great substitutes... there's a low-carb pasta option. And then of course [there's] cauliflower mashed potato. When you are doing something like a taco salad with cheese and meat and sour cream and salsa, all of that fits [in the meal plan]."

Over half (n=4) of weight goal achievers noted diminished hunger and cravings. For example, one participant commented, "I just love that I'm losing weight. It's the best diet I have ever been on, and I've been on a lot. And it seems effortless, it just seems like it's melting off. And I'm eating good and I'm

1  
2  
3 not hungry..." Another noted, "When I eat a higher fat diet, I'm not hungry. And that's been a big surprise  
4 to me." One weight goal non-achiever endorsed diminished hunger when she adhered to the low-carb  
5 meal plan; however, she also described social pressures to consume carbohydrates and non-adherence to  
6 the intervention at least 1-2 days per week.  
7  
8  
9

10  
11 Almost all (n=6) weight goal achievers experienced health benefits in addition to weight loss,  
12 which motivated their continued adherence to the low-carbohydrate meal plan. Several participants  
13 described increased energy levels and improved sleep. One stated, "[I was able] to decrease my blood  
14 pressure medications...[I'm] someone who's been on high blood pressure medication for probably 15, 20  
15 years, now it's cut in half, so that's significant."  
16  
17  
18  
19  
20  
21

22 Among weight goal non-achievers (n=7), three key themes emerged that hindered adherence to  
23 the low-carbohydrate meal plan: (1) difficulty giving up high-carbohydrate foods; (2) lack of social  
24 support; and (3) difficulty planning ahead.  
25  
26  
27

28 The majority of weight goal non-achievers (n=5) described difficulty giving up carbohydrates due  
29 to food preferences, and this was a particular challenge in the absence of social support. One participant  
30 commented, "The hardest [part is that] it's so much fun to go out for ice cream with my friends or just to  
31 go to a restaurant. And I don't like to have to order a salad or something... It's just kinda hard I guess,  
32 being around other people who are eating stuff that I shouldn't have." Another commented, "I live with  
33 somebody who eats things that I should not have. And it's become very difficult to resist those, especially  
34 as I go farther and farther into the program." In contrast, only one weight goal achiever noted difficulty  
35 giving up carbohydrates. However, this challenge was mitigated by the support of a spouse who also  
36 adhered to the meal plan: "The hardest thing for me, personally, is that I love bread, and I love potato,  
37 [but] as long as [my spouse and I] are working together on this, we're great."  
38  
39  
40  
41  
42  
43  
44  
45  
46  
47  
48

49 Several weight goal non-achievers (n=3) described difficulty with planning low-carbohydrate  
50 meals. One noted, "Probably the [biggest challenge] is the pre-planning that you have to do...[when] I  
51 was going grocery shopping, I had meals planned, and...I was doing much better than if I run out of food  
52 and I'm hungry and I just want something now."  
53  
54  
55  
56  
57  
58  
59  
60

1  
2  
3 Almost half (n=6) the interviewees expressed concern about potential adverse health  
4 consequences of increased dietary fat intake, including heart disease and elevated cholesterol levels. One  
5 participant stated, “For years and years and years, I've heard eating red meats, cheeses, and nuts, and low  
6 carbohydrate foods...is not good for your coronary system, your heart. You gotta understand the last 50  
7 years, [All I heard] was...sausage and steak and hamburger, and pork chops are not good for you. They're  
8 not good for your heart. But now it seems like things are changing. That's the only thing that bothers me.  
9 Otherwise, it's working great.”  
10  
11  
12  
13  
14  
15  
16  
17

## 18 DISCUSSION

19  
20  
21 We tested the feasibility and acceptability of a Diabetes Prevention Program in which participants  
22 were taught to follow a carbohydrate-restricted rather than a fat-restricted meal plan. Twelve percent  
23 (n=22) of eligible individuals enrolled in our study within 2 weeks of receiving an invitation letter. LC-  
24 DPP participation was slightly higher than that observed in traditional DPPs (6–8), including those  
25 offered by our institution's self-funded health plan (34). Given room-size limitations and the pilot nature  
26 of this study, we ceased recruitment efforts once we met our enrollment target and we may therefore be  
27 underestimating potential LC-DPP participation. Over half of LC-DPP participants were male while the  
28 majority of NDPP participants are female (4). Study retention, as measured by survey completion, was  
29 high (85%, n=18) at 6 months and decreased at 12 months (71%, n=15). Similarly, attendance at LC-DPP  
30 core sessions was high, meeting CDC DPRP standards (28) with 67% (n=14) attending at least 9 core  
31 sessions; attendance decreased during the program's maintenance phase with only 52% (n=11) attending  
32 at least 3 maintenance sessions.  
33  
34  
35  
36  
37  
38  
39  
40  
41  
42  
43  
44  
45

46 To our knowledge, this is the first study that aims to augment the weight loss effectiveness of the  
47 CDC's NDPP by modifying the program's dietary advice. At 12 months, percent body weight loss  
48 among all LC-DPP participants was greater than weight loss among historical NDPP controls (5.2%  
49 versus 4.2%) and an similar number of LC-DPP participants achieved at least 5% body weight loss (38%  
50 versus 35%) (4). Meta-analyses of NDPPs demonstrate a positive association between session attendance  
51  
52  
53  
54  
55  
56  
57  
58  
59  
60



1  
2  
3 and body weight loss (4,27). Due to sample size limitations, we were unable to evaluate the relationship  
4 between LC-DPP attendance and body weight change. However, among our sample, weight change was  
5 greater among survey completers (n=15) as compared to survey non-completers at 6 months (6.2% versus  
6 4.5%) and 12 months (6.4% vs. 5.2%).  
7  
8  
9

10  
11 During qualitative interviews, we explored facilitators of and barriers to low-carbohydrate dietary  
12 adherence. These data not only provide insight into the factors that may influence individuals' weight  
13 change outcomes, but also reveal potential opportunities to refine and tailor the intervention. For  
14 example, consistent with prior literature (35), our participants identified social support as a key factor in  
15 dietary adherence, suggesting that LC-DPP partner classes and or peer-support programs may be one  
16 strategy to augment program adherence. Furthermore, interviewees that achieved goal weight loss  
17 described enjoyment of the low-carbohydrate diet as compared to weight goal non-achievers who  
18 struggled to give up the carbohydrate-rich foods that they loved. Participants that do not adhere to the  
19 low-carbohydrate meal plan due to non-enjoyment of allowable foods may benefit from other evidence-  
20 based interventions for T2DM prevention (e.g., traditional DPP, metformin) or weight loss (e.g., Weight  
21 Watchers, pharmacotherapy, bariatric surgery), and these alternatives should be readily offered.  
22  
23  
24  
25  
26  
27  
28  
29  
30  
31  
32  
33  
34

35 The majority of interviewees expressed fear regarding the diet's fat content, reflecting the widely-  
36 held belief that dietary fat and cholesterol increase cardiovascular disease risk. While observational data  
37 demonstrating this association emerged in the 1950s (36), the causative role of dietary saturated fat and  
38 cholesterol in heart disease is not well-established (37). Furthermore, the Women's Health Initiative, the  
39 largest randomized controlled trial to evaluate health outcomes of low-fat diet adherence, showed no  
40 reduction in cardiovascular disease risk among intervention versus control group participants (38).  
41 Growing literature demonstrates favorable changes in cardiovascular disease risk factors (e.g., blood  
42 pressure) and serum biomarkers (e.g., LDL, HDL, and triglycerides) among individuals following low-  
43 carbohydrate, high-fat diets (16,17,19,22). Accordingly, the 2015-2020 U.S. Dietary Guidelines removed  
44 prior recommended limits on dietary fat and cholesterol intake, and clinical practice guidelines for T2DM  
45 (39) and obesity management (40) now endorse carbohydrate restriction as one evidence-based approach  
46  
47  
48  
49  
50  
51  
52  
53  
54  
55  
56  
57  
58  
59  
60

1  
2  
3 to lifestyle modification. Despite these changes, however, pervasive fears regarding dietary fat remain  
4 one primary barrier to implementation of a LC-DPP. We plan to revise the LC-DPP curriculum to better  
5 address participants' concerns and we will test serum lipids in future program evaluations.  
6  
7  
8

### 9 10 **LIMITATIONS**

11 First, we recruited individuals from one primary care clinic within an academic medical center,  
12 and our results are not generalizable to other populations. Second, we did not evaluate outcomes beyond  
13 12 months, and are therefore unable to assess long-term adherence to a carbohydrate-restricted meal plan.  
14 Finally, because this was a pilot study designed to evaluate feasibility and acceptability, we cannot assess  
15 the intervention's weight loss effectiveness. A large-scale comparative effectiveness trial of the LC-DPP  
16 versus traditional DPP is warranted.  
17  
18  
19  
20  
21  
22  
23

### 24 **CONCLUSIONS**

25 The CDC's NDPP is widely available throughout the United States. Yet, many program  
26 participants do not achieve the program's weight loss goal of at least 5%. A DPP adapted to teach  
27 participants to follow a low-carbohydrate rather than a low-fat diet may be one effective way to increase  
28 the program's weight loss effectiveness. In this study, we demonstrate that a LC-DPP is feasible and  
29 acceptable. Future work is needed to further evaluate the LC-DPP's weight loss effectiveness as  
30 compared to the NDPP. It is critical to explore issues concerning dietary adherence and sustainability as  
31 well as biomarker (e.g., lipid, HbA1c) changes and incident chronic disease (e.g., T2DM, cardiovascular  
32 disease) over time. Lastly, future work should explore the factors that facilitate or hinder LC-DPP weight  
33 loss success (e.g., presence or absence of social support) and develop tailored strategies that address these  
34 factors.  
35  
36  
37  
38  
39  
40  
41  
42  
43  
44  
45  
46  
47

### 48 **FOOTNOTES**

49  
50 **Contributors:** D.G., L.S., and C.R. designed the study. D.G., L.S., K.P., and A.T. developed the  
51 intervention. K.P., T.A., B.L., P.B., and S.S. collected the data. D.G. and C.R. analyzed the data; they  
52 take full responsibility for the integrity of data analyses. D.G. drafted the manuscript. All authors  
53 critically revised the manuscript.  
54

55 **Funding:** This project was funded by the Michigan Nutrition Obesity Research Center Small Grants  
56  
57  
58  
59

Program (5 P30 DK089503-07). Laura Saslow was supported by funding from the NIH, a K01 from the National Institute of Diabetes and Digestive and Kidney Diseases (DK107456). The funder had no role in study design, data collection and analysis, decision to publish, or preparation of the manuscript.

**Competing interests:** None declared.

**Ethics approval:** The study was approved by the University of Michigan Institutional Review Board.

**Data sharing:** De-identified data may be shared pending University of Michigan Institutional Review Board review and approval. Please email [dhafez@med.umich.edu](mailto:dhafez@med.umich.edu).

**Acknowledgements:** The authors thank the National Kidney Foundation of Michigan for their collaboration in this work.

## REFERENCES

1. **Gerstein HC, Santaguida P, Raina P, Morrison KM, Balion C, Hunt D, Yazdi H, Booker L.** Annual incidence and relative risk of diabetes in people with various categories of dysglycemia: A systematic overview and meta-analysis of prospective studies. *Diabetes Research and Clinical Practice* 2007;78(3):305–312.
2. **Group DPPR.** Reduction in the Incidence of Type 2 Diabetes with Lifestyle Intervention or Metformin. *New England Journal of Medicine* 2002;346(6):393–403.
3. **Vojta D, Koehler TB, Longjohn M, Lever JA, Caputo NF.** A Coordinated National Model for Diabetes Prevention. *American Journal of Preventive Medicine* 2013;44(4):S301–S306.
4. **Ely EK, Gruss SM, Luman ET, Gregg EW, Ali MK, Nhim K, Rolka DB, Albright AL.** A National Effort to Prevent Type 2 Diabetes: Participant-Level Evaluation of CDC's National Diabetes Prevention Program. *Diabetes Care* 2017;40(10):1331–1341.
5. **Webinar: Medicare Diabetes Prevention Program - Overview | Center for Medicare & Medicaid Innovation.** Available at: <https://innovation.cms.gov/resources/dpp-overview.html>. Accessed February 6, 2017.
6. **Wareham N.** Mind the gap: efficacy versus effectiveness of lifestyle interventions to prevent diabetes. *The Lancet Diabetes & Endocrinology* 2015;3(3):160–161.
7. **Jackson SL, Long Q, Rhee MK, Olson DE, Tomolo AM, Cunningham SA, Ramakrishnan U, Narayan KMV, Phillips LS.** Weight loss and incidence of diabetes with the Veterans Health Administration MOVE! lifestyle change programme: an observational study. *The Lancet Diabetes & Endocrinology* 2015;3(3):173–180.
8. **Aziz Z, Absetz P, Oldroyd J, Pronk NP, Oldenburg B.** A systematic review of real-world diabetes prevention programs: learnings from the last 15 years. *Implementation Science* 2015;10:172.

- 1  
2  
3 9. **DoIHavePrediabetes.org | Prevent Type 2 Diabetes.** *DoIHavePrediabetes*. Available at:  
4 <https://doihaveprediabetes.org/>. Accessed December 16, 2016.  
5
- 6  
7 10. **Prevent Diabetes STAT | General Public.** *Prevent Diabetes STAT*. Available at:  
8 <http://www.preventdiabetesstat.org>. Accessed December 16, 2016.  
9
- 10 11. **Sepah SC, Jiang L, Peters AL.** Long-Term Outcomes of a Web-Based Diabetes Prevention Program:  
11 2-Year Results of a Single-Arm Longitudinal Study. *J Med Internet Res* 2015;17(4).  
12 doi:10.2196/jmir.4052.  
13
- 14 12. **Hamman RF, Wing RR, Edelstein SL, Lachin JM, Bray GA, Delahanty L, Hoskin M, Kriska AM,**  
15 **Mayer-Davis EJ, Pi-Sunyer X, Regensteiner J, Venditti B, Wylie-Rosett J, for the Diabetes**  
16 **Prevention Program Research Group.** Effect of Weight Loss With Lifestyle Intervention on Risk of  
17 Diabetes. *Diabetes Care* 2006;29(9):2102–2107.  
18
- 19 13. **1990 Dietary Guidelines - health.gov.** Available at: <https://health.gov/dietaryguidelines/1990.asp>.  
20 Accessed June 11, 2019.  
21
- 22 14. **1995 Dietary Guidelines - health.gov.** Available at: <https://health.gov/dietaryguidelines/1995.asp>.  
23 Accessed June 11, 2019.  
24
- 25 15. **Teicholz N.** The scientific report guiding the US dietary guidelines: is it scientific? *BMJ* 2015:h4962.  
26  
27
- 28 16. **Feinman RD, Pogozelski WK, Astrup A, Bernstein RK, Fine EJ, Westman EC, Accurso A, Frassetto L,**  
29 **Gower BA, McFarlane SI, Nielsen JV, Krarup T, Saslow L, Roth KS, Vernon MC, Volek JS, Wilshire**  
30 **GB, Dahlqvist A, Sundberg R, Childers A, Morrison K, Manninen AH, Dashti HM, Wood RJ,**  
31 **Wortman J, Worm N.** Dietary carbohydrate restriction as the first approach in diabetes  
32 management: Critical review and evidence base. *Nutrition* 2015;31(1):1–13.  
33  
34
- 35 17. **Saslow LR, Kim S, Daubenmier JJ, Moskowitz JT, Phinney SD, Goldman V, Murphy EJ, Cox RM,**  
36 **Moran P, Hecht FM.** A randomized pilot trial of a moderate carbohydrate diet compared to a very  
37 low carbohydrate diet in overweight or obese individuals with type 2 diabetes mellitus or  
38 prediabetes. *PloS one* 2014;9(4):e91027.  
39
- 40 18. **Santos FL, Esteves SS, da Costa Pereira A, Yancy Jr WS, Nunes JPL.** Systematic review and meta-  
41 analysis of clinical trials of the effects of low carbohydrate diets on cardiovascular risk factors.  
42 *Obesity Reviews* 2012;13(11):1048–1066.  
43
- 44 19. **Hallberg SJ, McKenzie AL, Williams PT, Bhanpuri NH, Peters AL, Campbell WW, Hazbun TL, Volk**  
45 **BM, McCarter JP, Phinney SD, Volek JS.** Effectiveness and Safety of a Novel Care Model for the  
46 Management of Type 2 Diabetes at 1 Year: An Open-Label, Non-Randomized, Controlled Study.  
47 *Diabetes Ther* 2018;9(2):583–612.  
48  
49
- 50 20. **Nielsen JV, Joensson E.** Low-carbohydrate diet in type 2 diabetes. Stable improvement of  
51 bodyweight and glycemic control during 22 months follow-up. *Nutrition & metabolism*  
52 2006;3(1):22.  
53  
54  
55  
56  
57  
58  
59

- 1
  - 2
  - 3
  - 4
  - 5
  - 6
  - 7
  - 8
  - 9
  - 10
  - 11
  - 12
  - 13
  - 14
  - 15
  - 16
  - 17
  - 18
  - 19
  - 20
  - 21
  - 22
  - 23
  - 24
  - 25
  - 26
  - 27
  - 28
  - 29
  - 30
  - 31
  - 32
  - 33
  - 34
  - 35
  - 36
  - 37
  - 38
  - 39
  - 40
  - 41
  - 42
  - 43
  - 44
  - 45
  - 46
  - 47
  - 48
  - 49
  - 50
  - 51
  - 52
  - 53
  - 54
  - 55
  - 56
  - 57
  - 58
  - 59
  - 60
21. **Shai I, Schwarzfuchs D, Henkin Y, Shahar DR, Witkow S, Greenberg I, Golan R, Fraser D, Bolotin A, Vardi H, others.** Weight loss with a low-carbohydrate, Mediterranean, or low-fat diet. *New England Journal of Medicine* 2008;359(3):229–241.
22. **Athinarayanan SJ, Adams RN, Hallberg SJ, McKenzie AL, Bhanpuri NH, Campbell WW, Volek JS, Phinney SD, McCarter JP.** Long-Term Effects of a Novel Continuous Remote Care Intervention Including Nutritional Ketosis for the Management of Type 2 Diabetes: A 2-Year Non-randomized Clinical Trial. *Front. Endocrinol.* 2019;10. doi:10.3389/fendo.2019.00348.
23. **Paoli A, Rubini A, Volek JS, Grimaldi KA.** Beyond weight loss: a review of the therapeutic uses of very-low-carbohydrate (ketogenic) diets. *European journal of clinical nutrition* 2013;67(8):789–796.
24. **Accurso A, Bernstein RK, Dahlqvist A, Draznin B, Feinman RD, Fine EJ, Glead A, Jacobs DB, Larson G, Lustig RH, Manninen AH, McFarlane SI, Morrison K, Nielsen J, Ravnskov U, Roth KS, Silvestre R, Sowers JR, Sundberg R, Volek JS, Westman EC, Wood RJ, Wortman J, Vernon MC.** Dietary carbohydrate restriction in type 2 diabetes mellitus and metabolic syndrome: time for a critical appraisal. *Nutrition & Metabolism* 2008;5(1):9.
25. **Mckenzie A, Hallberg S, Bhanpuri NH, Athinarayanan SJ, Mccue J, Mccarter JP, Volek J, Phinney S.** Continuous Remote Care Model Utilizing Nutritional Ketosis Improves Type 2 Diabetes Risk Factors in Patients with Prediabetes. *Diabetes* 2018;67(Supplement 1):293-OR.
26. **Gann D, Gann E, Holt RS.** Successful symbiotic partnership between primary care physicians and a disease management program in the treatment of prediabetes. In: ; 2016. doi:10.15406/jdmcd.2016.3.00089.
27. **M. K. Ali, J. B. Echouffo-Tcheugui, D. F. Williamson.** How Effective Were Lifestyle Interventions In Real-World Settings That Were Modeled On The Diabetes Prevention Program? *Health Affairs* 2012;31(1):67–75.
28. **Requirements for CDC Recognition | Diabetes | NDPP.** 2018. Available at: <https://www.cdc.gov/diabetes/prevention/lifestyle-program/requirements.html>. Accessed December 6, 2018.
29. **Plano Clark VL, Schumacher K, West C, Edrington J, Dunn LB, Harzstark A, Melisko M, Rabow MW, Swift PS, Miaskowski C.** Practices for Embedding an Interpretive Qualitative Approach Within a Randomized Clinical Trial. *Journal of Mixed Methods Research* 2013;7(3):219–242.
30. **Defining Adult Overweight and Obesity | Overweight & Obesity | CDC.** Available at: <https://www.cdc.gov/obesity/adult/defining.html>. Accessed February 7, 2017.
31. **REDCap.** Available at: <https://www.project-redcap.org/>. Accessed June 19, 2017.
32. **Hsieh H-F, Shannon SE.** Three Approaches to Qualitative Content Analysis. *Qual Health Res* 2005;15(9):1277–1288.

- 1  
2  
3  
4  
5  
6  
7  
8  
9  
10  
11  
12  
13  
14  
15  
16  
17  
18  
19  
20  
21  
22  
23  
24  
25  
26  
27  
28  
29  
30  
31  
32  
33  
34  
35  
36  
37  
38  
39  
40  
41  
42  
43  
44  
45  
46  
47  
48  
49  
50  
51  
52  
53  
54  
55  
56  
57  
58  
59  
60
33. **Guetterman TC, Fetters MD, Creswell JW.** Integrating Quantitative and Qualitative Results in Health Science Mixed Methods Research Through Joint Displays. *Ann Fam Med* 2015;13(6):554–561.
  34. **Griauzde DH, Kullgren JT, Liestenfeltz B, Richardson C, Heisler M.** A mobile phone-based program to promote healthy behaviors among adults with prediabetes: study protocol for a pilot randomized controlled trial. *Pilot Feasibility Stud* 2018;4:48.
  35. **Metzgar CJ, Preston AG, Miller DL, Nickols-Richardson SM.** Facilitators and barriers to weight loss and weight loss maintenance: a qualitative exploration. *J Hum Nutr Diet* 2015;28(6):593–603.
  36. **The Diet and 15-Year Death Rate in the Seven Countries Study.** *Am J Epidemiol* 2017;185(11):1130–1142.
  37. **Hooper L, Martin N, Abdelhamid A, Smith GD.** Reduction in saturated fat intake for cardiovascular disease. *Cochrane Database of Systematic Reviews* 2015;(6). doi:10.1002/14651858.CD011737.
  38. **Howard BV, Horn LV, Hsia J, Manson JE, Stefanick ML, Wassertheil-Smoller S, Kuller LH, LaCroix AZ, Langer RD, Lasser NL, Lewis CE, Limacher MC, Margolis KL, Mysiw WJ, Ockene JK, Parker LM, Perri MG, Phillips L, Prentice RL, Robbins J, Rossouw JE, Sarto GE, Schatz IJ, Snetselaar LG, Stevens VJ, Tinker LF, Trevisan M, Vitolins MZ, Anderson GL, Assaf AR, Bassford T, Beresford SAA, Black HR, Brunner RL, Brzyski RG, Caan B, Chlebowski RT, Gass M, Granek I, Greenland P, Hays J, Heber D, Heiss G, Hendrix SL, Hubbell FA, Johnson KC, Kotchen JM.** Low-Fat Dietary Pattern and Risk of Cardiovascular Disease: The Women’s Health Initiative Randomized Controlled Dietary Modification Trial. *JAMA* 2006;295(6):655–666.
  39. **Association AD.** 5. Lifestyle Management: Standards of Medical Care in Diabetes—2019. *Diabetes Care* 2019;42(Supplement 1):S46–S60.
  40. **Management of Obesity and Overweight (OBE) (2014) - VA/DoD Clinical Practice Guidelines.** Available at: <https://www.healthquality.va.gov/guidelines/cd/obesity/index.asp>. Accessed June 25, 2019.

## TABLES

|                                           | All participants<br>(n=21) | Program completers <sup>1</sup><br>(n=15) | Semi-structured<br>interviewees (n=14) |
|-------------------------------------------|----------------------------|-------------------------------------------|----------------------------------------|
| Mean age in years, mean (SD)              | 58.9 (11.0)                | 60.5 (10.2)                               | 58.7 (9.4)                             |
| Male, n (%)                               | 12 (57.1)                  | 8 (53.3)                                  | 6 (42.9)                               |
| White, n (%)                              | 18 (85.7)                  | 13 (86.7)                                 | 12 (85.7)                              |
| Education > high school, n (%)            | 17 (85.0)                  | 12 (80.0)                                 | 13 (92.9)                              |
| Married / partnered, n (%)                | 15 (71.4)                  | 12 (80.0)                                 | 10 (71.4)                              |
| Mean BMI in kg/m <sup>2</sup> , mean (SD) | 34.1 (5.4)                 | 33.9 (4.2)                                | 32.7 (3.1)                             |
| Baseline HbA1c, mean (SD)                 | 5.9 (0.2)                  | 6.0 (0.2)                                 | 5.9 (0.2)                              |

<sup>1</sup>Defined as having completed the 12-month survey.

| Outcomes<br>(mean (SD) or N (%)) | 6 months   |                      | 12 months  |                                   |
|----------------------------------|------------|----------------------|------------|-----------------------------------|
|                                  | All (n=21) | Completers<br>(n=15) | All (n=21) | Completers <sup>1</sup><br>(n=15) |
| Weight change in kg              | -4.3 (4.8) | -6.0 (4.7)           | -4.9 (5.8) | -6.1 (6.1)                        |
| Percent weight change            | 4.5 (5.0)  | 6.2 (4.8)            | 5.2 (6.0)  | 6.4 (6.4)                         |
| At least 5% weight loss          | 9 (42.9)   | 9 (60.0)             | 8 (38.1)   | 7 (46.7)                          |
| At least 10% weight loss         | 3 (14.2)   | 3 (20.0)             | 6 (27.3)   | 5 (33.3)                          |
| HbA1c change                     | -0.1 (0.2) | -0.2 (0.2)           | 0.06 (0.3) | 0.04 (0.4)                        |

<sup>1</sup>Defined as having completed the 12-month survey.

| Key Theme                                      | Representative Quotes                                                                                                                                                                                                                                                                                                                                                                                 |
|------------------------------------------------|-------------------------------------------------------------------------------------------------------------------------------------------------------------------------------------------------------------------------------------------------------------------------------------------------------------------------------------------------------------------------------------------------------|
| <b>≥5% body weight loss at 12 months (n=7)</b> |                                                                                                                                                                                                                                                                                                                                                                                                       |
| Enjoyment of low-carbohydrate foods            | <p>“[I’m eating] all the cheese and the meat and the vegetables I’m allowed. I’m enjoying all of it. And I found snacks like sugarless jello...beef sticks, salami with cheese...and I’m really enjoying it...If I have cake it’ll be here and there, like for a party, but I know that I can get right back on this diet in the next day.”</p> <p><i>-14.5 kg (18% body weight) at 12 months</i></p> |
| Diminished hunger and cravings                 | <p>“I don’t have cravings. I like the fact that I’m not craving food and thinking about food all the time.”</p> <p><i>-8.6 kg (9.5% body weight) at 12 months</i></p>                                                                                                                                                                                                                                 |
| Health benefits beyond weight loss             | <p>“By losing the weight, I feel more active. It seems like my joints don’t hurt as bad.”</p> <p><i>-14.5 kg (14% body weight) at 12 months</i></p>                                                                                                                                                                                                                                                   |

| <b>≤5% body weight loss at 12 months (n=6)</b> |                                                                                                                                                                                                                                                                                                                                                                                                                          |
|------------------------------------------------|--------------------------------------------------------------------------------------------------------------------------------------------------------------------------------------------------------------------------------------------------------------------------------------------------------------------------------------------------------------------------------------------------------------------------|
| Difficulty giving up high-carbohydrate foods   | <p>“The hardest thing is avoiding food that I like or love, like breads and mashed potatoes and potato chips and pasta and going out to dinner and having a nice, big juicy hamburger on a nice bun. Just taking the bun off, not having pasta, not having mashed potatoes, I miss that. But, if I see the weight loss keep going, I'm okay to tolerate that.”</p> <p><i>-3.6 kg (3.4% body weight) at 12 months</i></p> |
| Lack of social support                         | <p>“It's very hard sometimes when you're traveling with friends, going on road trips, going to restaurants, watching everybody eat, the high carbohydrate food, being of a Mediterranean descent with pastas and stuff like that, spaghetti and pizzas and noodles, it's very hard to adhere to it at times.”</p> <p><i>-2.2 kg (2.3% body weight) at 12 months</i></p>                                                  |
| Trouble pre-planning meals                     | <p>“I think just like with any sort of food awareness...there's time involved, and it's just hard to pre-plan and make meals that would benefit me and that my kids would like.”</p> <p><i>-0.63 kg (0.6% body weight) at 12 months</i></p>                                                                                                                                                                              |



## Appendix 1. Quiz to assess LC-DPP teacher's knowledge about low-carbohydrate meal plan

Please choose all answers that are correct (by bolding or starring the right answer or by e-mailing me your choices in plain text). More than 1 answer will be correct.

1. Which of these fast-food restaurants reliably have standard low-carb options:
  - a. Jimmy John's
  - b. Chipotle
  - c. Chinese restaurants
2. When making something low-carb at a restaurant make sure to consider:
  - a. asking for extra butter pats or low-carb sides if they aren't serving you enough fat
  - b. asking for lettuce-wrapped sandwiches and burgers
  - c. checking for how salty the dressings are
3. Some low-carb flours include:
  - a. almond flour
  - b. cauliflower
  - c. coconut flour
  - d. rice flour
4. When someone is following a low-carb diet, we want their weight loss to be:
  - a. more than 5 pounds a week at first
  - b. less than 5 pounds a week at first
  - c. generally we don't care how fast or slow their weight loss is, although if they're not at their ideal weight and they're still not losing weight, it's time to troubleshoot
5. Low-carb diets tend to make people:
  - a. hungrier and less thirsty
  - b. hungrier and more thirsty
  - c. less hungry and less thirsty
  - d. less hungry and more thirsty
6. If someone is constipated, they could try:
  - a. taking a magnesium supplement
  - b. drinking more water
  - c. adding in more foods with potassium
7. When attending a party, how can someone prepare to stick to their low-carb meal plan?
  - a. bring something low-carb
  - b. eat before hand so they don't arrive very hungry
  - c. give themselves a non low-carb treat at the party
  - d. pre-think how they will deal with peer pressure at the party
8. What low-carb foods can often be found at convenience or corner stores?
  - a. salted nuts (ideally lower carb like almonds, walnuts, and pecans and not higher carb like cashews and pistachios)
  - b. hard boiled eggs
  - c. string cheese
  - d. pork rinds (make sure they don't include trans fats)

## 9. Net carbs:

- a. are total grams of carbohydrates minus grams of fiber
- b. are also called non-fiber grams of carbohydrates
- c. do not include naturally present sugars
- d. should be no more than about 20-35 grams a day for someone following a very low-carbohydrate diet

## 10. A very low-carb diet typically:

- a. includes fruit other than berries
- b. increases blood pressure
- c. includes saturated fat from animal and plant sources

## 11. Rare side effects of a low-carb diet include:

- a. insomnia
- b. hair loss
- c. more cavities
- d. diarrhea

## 12. A participant is facing a weight-loss plateau. What are some possible causes?

- a. eating too many calories
- b. consuming foods with artificial sweeteners most days
- c. poor sleep
- d. eating more than 40 grams of protein at once

## 13. A participant says they're feeling dizzy or woozy. What are some possible causes?

- a. Insufficient intake of water and salt
- b. Perceived or actual hypoglycemia
- c. Low blood pressure

## 14. A participant is worried about following a low-carb diet since they are very physically active and don't want it to hurt their performance. How might you respond?

- a. Weight loss on a low-carb diet is typically muscle-sparing, which can help preserve athletic performance
- b. Lots of athletes, especially those who do sports that require endurance, do quite well on a low-carb diet, since it prevents "hitting the wall" or "bonking."
- c. They should not exercise heavily while following a very low-carbohydrate diet.

## 15. What should participants know about alcohol?

- a. When on a low-carb diet, participants may get drunk more easily from less alcohol.
- b. Unsweetened and unflavored liquor has 0g net carbs.
- c. Alcohol may decrease fat burning and weight loss

## 16. What types of fats are preferred on a low-carb diet?

- a. Lard with partially hydrogenated oils added
- b. Coconut oil
- c. Olive oil
- d. Butter

## 17. Which of the following are true about sugar alcohols?

- a. Calculate net carbs by only counting half of the grams of sugar alcohols
- b. They can cause intestinal distress and flatulence

- 1  
2  
3 c. Erythritol is often considered to have the least amount of influence on blood sugar of all  
4 the sugar alcohols  
5 d. They are an essential part of a low-carb diet.  
6

7 18. A participant is complaining of intestinal distress. What might be causing it?

- 8 a. Cauliflower  
9 b. Sugar-free gum  
10 c. Erythritol  
11 d. Broccoli  
12

13 19. Which of these foods are potentially problematic on a low-carb diet because of their carb  
14 content?  
15

- 16 a. Starchy vegetables like carrots  
17 b. Butter  
18 c. Chocolate with a cacao content less than 85%  
19 d. Bacon and processed meats with added sugars  
20

21 20. Which of the following typically improve when someone follows a low-carb meal plan?

- 22 a. triglycerides  
23 b. weight  
24 c. HbA1c  
25  
26  
27  
28  
29  
30  
31  
32  
33  
34  
35  
36  
37  
38  
39  
40  
41  
42  
43  
44  
45  
46  
47  
48  
49  
50  
51  
52  
53  
54  
55  
56  
57  
58  
59  
60

| Amount Per Serving        |       |                                |
|---------------------------|-------|--------------------------------|
| <b>Calories</b>           | 180   | Calories from Fat 100          |
|                           |       | Calories from Saturated Fat 15 |
| % Daily Value*            |       |                                |
| <b>Total Fat</b>          | 11g   | <b>17 %</b>                    |
| Saturated Fat             | 2g    | <b>9 %</b>                     |
| Trans Fat                 | 0g    |                                |
| Polyunsaturated Fat       | 3.5g  |                                |
| Monounsaturated Fat       | 5g    |                                |
| <b>Cholesterol</b>        | 0mg   | <b>0 %</b>                     |
| <b>Sodium</b>             | 110mg | <b>5 %</b>                     |
| <b>Potassium</b>          | 150mg | <b>4 %</b>                     |
| <b>Total Carbohydrate</b> | 17g   | <b>6 %</b>                     |
| Dietary Fiber             | 14g   | <b>54 %</b>                    |
| Sugars                    | 2g    |                                |

21. How many net grams of carbohydrates are in the food to the left?

- a. 17
- b. 14
- c. 3
- d. 2

| Amount per serving        |                 |
|---------------------------|-----------------|
| <b>Calories</b>           | <b>230</b>      |
| % Daily Value*            |                 |
| <b>Total Fat</b>          | <b>8g 10%</b>   |
| Saturated Fat             | 1g 5%           |
| Trans Fat                 | 0g              |
| <b>Cholesterol</b>        | <b>0mg 0%</b>   |
| <b>Sodium</b>             | <b>160mg 7%</b> |
| <b>Total Carbohydrate</b> | <b>37g 13%</b>  |
| Dietary Fiber             | 4g 14%          |
| Total Sugars              | 12g             |
| Includes 10g Added Sugars | 20%             |
| <b>Protein</b>            | <b>3g</b>       |

22. How many net grams of carbohydrates are in the food to the left?

- a. 37
- b. 34
- c. 27
- d. 25

---

## A Mixed Methods Pilot Study of a Low-Carbohydrate Diabetes Prevention Program Among Individuals with Prediabetes

---

### STUDY PROTOCOL

#### A. Background and Significance

An estimated 86 million US adults have prediabetes [11], and, without intervention, many will develop T2DM over time [12]. Fortunately, T2DM can be prevented or delayed through modest lifestyle changes. The landmark Diabetes Prevention Program (DPP) Trial demonstrated a 58 percent reduction in the 3-year incidence of T2DM among individuals with prediabetes who achieved 7 percent body weight loss and engaged in routine physical activity [13]. Accordingly, the DPP lifestyle intervention has been translated to communities across the United States [14][15], and, on average, participant weight change is 4 percent at 12 months [16]. Thus, while group-based DPPs can effectively promote weight loss among some participants, many DPP participants do not achieve the program goal of 5 to 7 percent body weight loss.

Novel strategies to help participants achieve DPP weight-loss goals are important for two key reasons. First, weight loss is the primary driver of T2DM risk reduction [17], and the potential population health impact of the intervention is diminished when participants do not lose weight. Second, a growing number of health plans including Medicare offer coverage for the DPP [18][19] and reimbursement is largely tied to weight loss of at least 5 percent at 6 months and 12 months [20]. The DPP costs approximately \$400-\$500 per participant per year [14]. Unfortunately, organizations that offer the DPP may be reimbursed for much less than this if participants do not meet weight loss goals, which could significantly compromise the program's long-term financial sustainability.

One promising approach to help DPP participants lose more weight may be through a low-carbohydrate (LC) dietary intervention. Consistent with United States Dietary Guidelines (USDG) [21], the original DPP Trial [13] and translational group-based curricula [22][23] recommend a low-fat (LF), calorie-restricted diet. However, there is growing controversy regarding the scientific merit of the Dietary Guidelines [21][1] as well as growing recognition that LC diets may be more effective than LF diets for short-term weight loss [2][3] and long-term weight maintenance [4][5]. Notably, weight loss occurs without calorie restriction [24] and LC diets improve blood glucose levels among individuals with T2DM and insulin resistance [24][25][26]. Thus, a LC dietary intervention for prediabetes may augment individual weight loss and T2DM risk reduction while also maximizing third-party reimbursement.

#### B. Objective

In this mixed methods pilot study, we aim to test whether a LC-DPP may lead to greater weight loss than the original DPP. In addition to objective measures of this program's preliminary efficacy (e.g. weight, HbA1c) we will also obtain qualitative participant feedback on the intervention. Taken together, these data will be used to improve the curriculum and inform a larger-scale intervention.

#### C. Specific Aims

**Aim 1: To estimate weight loss from a Diabetes Prevention Program that is modified to incorporate a Low Carbohydrate (LC-DPP) rather than the traditional low fat diet among individuals with prediabetes.** We will conduct a single-arm mixed methods pilot study to estimate weight loss as well as the percentage of participants who achieve 5% weight loss in a 16-week, LC-DPP. Weight loss from the pilot LC-DPP cohort will be compared to weight loss outcomes from previously published DPP studies. We will also evaluate secondary outcomes including change in physical activity, mental health, psychosocial functioning, and hemoglobin A1c over the 6-month study period.

**Aim 2: To evaluate the acceptability of a LC-DPP among individuals with prediabetes.** We will collect data on participant recruitment, session attendance, and intervention satisfaction to assess the acceptability of

LC-DPP. We will conduct qualitative, semi-structured interviews with a purposive sample of LC-DPP participants to solicit participant feedback on the LC-DPP curriculum and to better understand barriers to (e.g. food cravings, side effects) and facilitators of (e.g. satiety, energy) intervention adherence.

**Aim 3: To integrate quantitative and qualitative data to better understand the mechanism(s) of change in weight, physical activity, mental health factors, psychosocial functioning factors, and hemoglobin A1c.** This will allow us to determine which component(s) of the LC-DPP intervention were most and least effective. This information will be used to improve the LC-DPP curriculum and will inform a larger-scale intervention.

#### D. Research Design and Methodology

We will conduct a single-arm mixed methods pilot study to test the preliminary efficacy on weight loss of a LC-DPP among individuals with prediabetes (as defined by the American Diabetes Association [ADA] [10]). We hypothesize that at least 50% of LC-DPP participants will achieve greater than 5% weight and that the average weight loss in the LC-DPP will be greater than the average weight loss from traditional DPPs of the same duration (loss of 3.7 kg [27] or 4 percent of body weight [16]).

To do this, we will modify the Centers for Disease Control and Prevention's (CDC's) DPP curriculum, which consists of 16-weekly sessions delivered over 6 months (i.e. core phase) followed by 6 monthly sessions (i.e. maintenance phase). Importantly, our adapted curriculum will adhere to the CDC's Diabetes Prevention Recognition Program (DPRP) guidelines, which aim to maintain the integrity of the DPP in heterogeneous settings. The DPRP formally recognizes sites that achieve specific targets (e.g. session attendance, weight loss) through use of a CDC-approved curriculum. Therefore, our curriculum, if effective, may be eligible for CDC-approval, which would facilitate future dissemination of this intervention.

We will use a mixed-methods sequential explanatory design, which is to say that quantitative data and qualitative data will be collected in two consecutive phases within the study [28]. Specifically, in the first phase, we will collect and analyze the quantitative data (e.g. surveys, weight, HbA1c). In the second phase, we will collect and analyze qualitative data (e.g. semi-structured interviews). The rationale for this approach is that the quantitative data will provide a general overview of the intervention's efficacy and limitations, and the qualitative data will help to explain these findings by exploring participants' experiences and perspectives in more depth.

#### Intervention

We will recruit at least 20 individuals with prediabetes to participate in the LC-DPP. To deliver the intervention, we will partner with the National Kidney Foundation of Michigan's (NKFM's) Diabetes Prevention Research Center. NKFM delivers the DPP in communities throughout southern Michigan and is fully recognized by the CDC's DPRP. Further, NKFM has previously partnered with one of our study team members (DHG) to successfully deliver the DPP within a University of Michigan primary care clinic [29]. An experienced NKFM lifestyle coach will be trained to deliver the LC-DPP. The LC-DPP lifestyle coach will deliver 16-weekly one-hour sessions over the first 6 months and 6 maintenance sessions over the subsequent 6 months.

The CDC's Diabetes Prevention Program instructs participants to adhere to a fat-restricted diet with an explicit cap of less than 33-55 grams of fat per day depending on starting body weight. In contrast, LC-DPP participants will be initially instructed to follow *ad-libitum* very low-carbohydrate, ketogenic diet, which restricts carbohydrate intake (not including fiber) to 20-35 grams per day with the goal of achieving nutritional ketosis. Participants will be encouraged to eat a normal amount of protein (roughly 80-120 grams per day) and to derive the remaining calories from fat. Allowable foods include: meats, fish, poultry, eggs, cheese, seeds, nuts, leafy greens, non-starchy vegetables, and some fruits.

To minimize potential side effects (e.g. headache, constipation, muscle cramps, diarrhea, general weakness, and rash) participants will be instructed to replace one meal a week with a low-carbohydrate alternative, starting with breakfast. Participants will be counseled to drink sufficient water and to consume adequate sodium. Further, primary care providers will be notified of their patients' involvement in this study, and they will be given a handout that describes the intervention, potential side effects, and strategies to minimize side

effects.

### Study Population

We will recruit individuals based on the following inclusion criteria: (1) overweight, defined as BMI $\geq$ 25 kg/m<sup>2</sup> [31]; (2) HbA1c between 5.7-6.4% drawn within 6 months of the study start date; (3) willingness to participate in group-based classes; and (4) able to engage in at least light physical activities such as walking.

We will exclude individuals based on the following criteria: (1) history of type 1 diabetes or type 2 diabetes; (2) current participation in another lifestyle or behavior change program or research study; (3) vegetarian or vegan lifestyle; (4) history of bariatric surgery; (5) inability to read, write, or speak English; (6) inability to provide informed consent; or (7) women who are pregnant or intend to become pregnant during the intervention period. We will also exclude individuals who are insured by Premier Care or Grad Care, as they have the opportunity to participate in a standard DPP, which is offered as a covered benefit through their health plan. Because the traditional DPP is currently standard-of-care for diabetes prevention and because most health plans do not cover the intervention, we will intentionally recruit individuals who do not otherwise have access to a lifestyle change program to prevent diabetes. If our intervention is successful, it may be made available to all individuals.

### Recruitment

We will recruit individuals from a Michigan Medicine primary care clinic. We will use the Electronic Health Record (EHR) Reporting Tool to identify individuals who meet study eligibility criteria. A study invitation letter will be sent to at least 150 individuals. Two weeks after the letter is sent, a member of the study team will contact individuals who have not yet enrolled to directly invite them to take part this LC-DPP. Additionally, we will accept direct referrals to the program from primary care providers at Canton Health Center.

### Setting

The intervention will be delivered in the conference room of the primary care clinic from which patients are recruited. In this way, we will ensure that the LC-DPP location is accessible to study participants.

### Quantitative Data source

#### **a) Weight**

Participants will be encouraged to self-monitor weight using a home scale, if available, although this data will not be collected by the study team. In accordance with standard DPP operating procedure, participants will be weighed in a private room prior to each session and their weight will be recorded by a member of the study team.

#### **b) Physical activity**

In accordance with standard DPP operating procedure, participants will be encouraged to self-monitor physical activity minutes and to report this information to the lifestyle coach at the start of each session.

#### **c) Hemoglobin A1c**

We will evaluate change in hemoglobin A1c (HbA1c) over the study period. Baseline HbA1c will be abstracted from the electronic health record (EHR). Per study eligibility criteria, this HbA1c will be drawn within 6 months of the study start date. Primary care physicians will be notified via EHR communication (i.e. portal message) that their patient is participating in this intervention and they will be asked to obtain a repeat HbA1c at 6-months and 12-months. This laboratory test will not be billed to the study, as annual monitoring of HbA1c is standard-of-care for individuals with prediabetes.

#### **d) Session attendance**

Participants will be encouraged to attend all sessions and, in accordance with standard DPP operating procedure, attendance will be recorded by the lifestyle coach.

e) RedCap surveys

At baseline, 6 months, and 12 months study participants will be invited to complete an online RedCap survey. The survey will assess domains related to the following: global health and well-being; sleep; food cravings; stress eating; hunger; energy; mood; physical symptoms; side effects; and cost of food. At baseline, we will ask participants to provide sociodemographic characteristics. At 6 months and 12 months, participants will be asked to provide feedback about the study.

Qualitative Data Sources

Participants will be encouraged to maintain a log of food intake and physical activity. Each week, the lifestyle coach will review the logs and provide individual feedback. We will retain copies of participants' logs from their first 2 weeks in the study and their last 2 weeks in the study. In this way, we can qualitatively assess changes in dietary habits and physical activity.

We will conduct qualitative, semi-structured interviews with a purposive sample of LC-DPP participants to solicit participant feedback on the LC-DPP curriculum and to better understand barriers to (e.g. food cravings, side effects) and facilitators of (e.g. satiety, energy) intervention adherence.

Outcomes

The primary outcome for this study will be change in weight from baseline to 6 months. Secondary outcomes will include change in the following measures: weight, physical activity, hemoglobin A1c, and survey measures.

Analysis

*Quantitative analysis*

For all continuous outcomes, we calculate mean change and standard deviation from baseline to 6 months and 12 months. For all categorical outcomes, we will use chi-square or Fisher's exact tests to examine changes from baseline to 6 and 12 months. We will conduct all analyses using Stata 14.

*Qualitative analysis:*

Semi-structured interviews will be recorded and transcribed verbatim. Interviews will then be imported into qualitative analysis software. Two investigators will independently read and code transcribed interviews. Interviews will then be coded jointly using consensus conferences. Interviews will be analyzed using directed content analysis [33], which is to say that codes will be created to reflect the main topics in the interview guide and to characterize the patterns and themes that emerged from the data [34].

**NOTE: We have a finalized Collaboration Agreement with the National Kidney Foundation of Michigan.**

**References**

1. Ludwig DS. Lifespan Weighed Down by Diet. JAMA. 2016;315:2269–70.
2. Saslow LR, Kim S, Daubenmier JJ, Moskowitz JT, Phinney SD, Goldman V, et al. A randomized pilot trial of a moderate carbohydrate diet compared to a very low carbohydrate diet in overweight or obese individuals with type 2 diabetes mellitus or prediabetes. PloS One. 2014;9:e91027.
3. Santos FL, Esteves SS, da Costa Pereira A, Yancy Jr WS, Nunes JPL. Systematic review and meta-analysis of clinical trials of the effects of low carbohydrate diets on cardiovascular risk factors. Obes. Rev. 2012;13:1048–66.



- 1 4. Nielsen JV, Joensson E. Low-carbohydrate diet in type 2 diabetes. Stable improvement of bodyweight and  
2 glycemic control during 22 months follow-up. *Nutr. Metab.* 2006;3:22.
- 3 5. Shai I, Schwarzfuchs D, Henkin Y, Shahar DR, Witkow S, Greenberg I, et al. Weight loss with a low-  
4 carbohydrate, Mediterranean, or low-fat diet. *N. Engl. J. Med.* 2008;359:229–241.
- 5 6. Gardner CD. Tailoring dietary approaches for weight loss. *Int. J. Obes. Suppl.* 2012;2:S11–5.
- 6 7. Stern L, Iqbal N, Seshadri P, Chicano KL, Daily DA, McGrory J, et al. The effects of low-carbohydrate  
7 versus conventional weight loss diets in severely obese adults: one-year follow-up of a randomized trial. *Ann.*  
8 *Intern. Med.* 2004;140:778–785.
- 9 8. Centers for Disease Control and Prevention. National Diabetes Statistics Report: Estimates and Its Burden in  
10 the United States [Internet]. [cited 2016 May 27]. Available from:  
11 <http://www.cdc.gov/diabetes/pubs/statsreport14/national-diabetes-report-web.pdf>
- 12 9. Huang Y, Cai X, Mai W, Li M, Hu Y. Association between prediabetes and risk of cardiovascular disease  
13 and all cause mortality: systematic review and meta-analysis. *BMJ.* 2016;i5953.
- 14 10. 2016-Standards-of-Care.pdf [Internet]. [cited 2017 Feb 6]. Available from:  
15 [http://care.diabetesjournals.org/content/suppl/2015/12/21/39.Supplement\\_1.DC2/2016-Standards-of-Care.pdf](http://care.diabetesjournals.org/content/suppl/2015/12/21/39.Supplement_1.DC2/2016-Standards-of-Care.pdf)
- 16 11. 2014 Diabetes Report Card - diabetesreportcard2014.pdf [Internet]. [cited 2016 May 27]. Available from:  
17 <http://www.cdc.gov/diabetes/pdfs/library/diabetesreportcard2014.pdf>
- 18 12. Gerstein HC, Santaguida P, Raina P, Morrison KM, Balion C, Hunt D, et al. Annual incidence and relative  
19 risk of diabetes in people with various categories of dysglycemia: A systematic overview and meta-analysis of  
20 prospective studies. *Diabetes Res. Clin. Pract.* 2007;78:305–12.
- 21 13. Group DPPR. Reduction in the Incidence of Type 2 Diabetes with Lifestyle Intervention or Metformin. *N.*  
22 *Engl. J. Med.* 2002;346:393–403.
- 23 14. Vojta D, Koehler TB, Longjohn M, Lever JA, Caputo NF. A Coordinated National Model for Diabetes  
24 Prevention. *Am. J. Prev. Med.* 2013;44:S301–6.
- 25 15. Aziz Z, Absetz P, Oldroyd J, Pronk NP, Oldenburg B. A systematic review of real-world diabetes  
26 prevention programs: learnings from the last 15 years. *Implement. Sci.* 2015;10:172.
- 27 16. M. K. Ali, J. B. Echouffo-Tcheugui, D. F. Williamson. How Effective Were Lifestyle Interventions In Real-  
28 World Settings That Were Modeled On The Diabetes Prevention Program? *Health Aff. (Millwood).*  
29 2012;31:67–75.
- 30 17. Hamman RF, Wing RR, Edelstein SL, Lachin JM, Bray GA, Delahanty L, et al. Effect of Weight Loss With  
31 Lifestyle Intervention on Risk of Diabetes. *Diabetes Care.* 2006;29:2102–7.
- 32 18. Alex ADA 1701 NBS, ria, 1-800-Diabetes V 22311. National Diabetes Prevention Program Named the First  
33 Preventive Health Initiative Eligible for Medicare Coverage via CMMI Expansion [Internet]. *Am. Diabetes*  
34 *Assoc.* [cited 2016 May 27]. Available from: [http://www.diabetes.org/newsroom/press-releases/2016/national-](http://www.diabetes.org/newsroom/press-releases/2016/national-dpp-named-first-preventive-health-initiative-eligible-for-medicare.html)  
35 [dpp-named-first-preventive-health-initiative-eligible-for-medicare.html](http://www.diabetes.org/newsroom/press-releases/2016/national-dpp-named-first-preventive-health-initiative-eligible-for-medicare.html)
- 36 19. Health Plans Preventing Diabetes and Improving Well-Being [Internet]. AHIP. 2016 [cited 2016 May 27].  
37 Available from: <https://www.ahip.org/diabetes/>
- 38 20. Webinar: Medicare Diabetes Prevention Program - Overview | Center for Medicare & Medicaid Innovation  
39 [Internet]. [cited 2017 Feb 6]. Available from: <https://innovation.cms.gov/resources/dpp-overview.html>
- 40 21. Teicholz N. The scientific report guiding the US dietary guidelines: is it scientific? *BMJ.* 2015;h4962.
- 41 22. Curricula and Handouts | NDPP | Diabetes | CDC [Internet]. [cited 2017 Feb 6]. Available from:  
42 <https://www.cdc.gov/diabetes/prevention/lifestyle-program/curriculum.html>
- 43 23. Group Lifestyle Balance Materials [Internet]. [cited 2017 Feb 6]. Available from:  
44 <http://www.diabetesprevention.pitt.edu/index.php/group-lifestyle-balance-materials/>
- 45 24. Paoli A, Rubini A, Volek JS, Grimaldi KA. Beyond weight loss: a review of the therapeutic uses of very-  
46 low-carbohydrate (ketogenic) diets. *Eur. J. Clin. Nutr.* 2013;67:789–796.
- 47 25. Feinman RD, Pogozelski WK, Astrup A, Bernstein RK, Fine EJ, Westman EC, et al. Dietary carbohydrate  
48 restriction as the first approach in diabetes management: Critical review and evidence base. *Nutrition.*  
49 2015;31:1–13.
- 50 26. Accurso A, Bernstein RK, Dahlqvist A, Draznin B, Feinman RD, Fine EJ, et al. Dietary carbohydrate  
51 restriction in type 2 diabetes mellitus and metabolic syndrome: time for a critical appraisal. *Nutr. Metab.*  
52 2008;5:9.

- 1  
2  
3  
4  
5  
6  
7  
8  
9  
10  
11  
12  
13  
14  
15  
16  
17  
18  
19  
20  
21  
22  
23  
24  
25  
26  
27  
28  
29  
30  
31  
32  
33  
34  
35  
36  
37  
38  
39  
40  
41  
42  
43  
44  
45  
46  
47  
48  
49  
50  
51  
52  
53  
54  
55  
56  
57  
58  
59  
60
27. Mudaliar U, Zabetian A, Goodman M, Echouffo-Tcheugui JB, Albright AL, Gregg EW, et al. Cardiometabolic Risk Factor Changes Observed in Diabetes Prevention Programs in US Settings: A Systematic Review and Meta-analysis. *PLoS Med.* 2016;13:e1002095.
28. Ivankova NV. Using Mixed-Methods Sequential Explanatory Design: From Theory to Practice. *Field Methods.* 2006;18:3–20.
29. Hafez D, De Michele M, Sachdev N. Frontline Account: Resident-led Implementation of the National Diabetes Prevention Program within Primary Care Clinics of a Large, Academic Medical Center. *J. Gen. Intern. Med.* 2016;31:573–5.
30. Curricula and Handouts | NDPP | Diabetes | CDC [Internet]. [cited 2017 Feb 6]. Available from: <https://www.cdc.gov/diabetes/prevention/lifestyle-program/curriculum.html>
31. Defining Adult Overweight and Obesity | Overweight & Obesity | CDC [Internet]. [cited 2017 Feb 7]. Available from: <https://www.cdc.gov/obesity/adult/defining.html>
32. Bravata DM, Sanders L, Huang J, Krumholz HM, Olkin I, Gardner CD, et al. Efficacy and Safety of Low-Carbohydrate Diets: A Systematic Review. *JAMA.* 2003;289:1837–50.
33. Hsieh H-F, Shannon SE. Three Approaches to Qualitative Content Analysis. *Qual. Health Res.* 2005;15:1277–88.
34. Potter WJ, Levine-Donnerstein D. Rethinking validity and reliability in content analysis. *J. Appl. Commun. Res.* 1999;27:258–84.

# BMJ Open

## A Mixed Methods Pilot Study of a Low-Carbohydrate Diabetes Prevention Program Among Adults with Prediabetes in the US

|                                 |                                                                                                                                                                                                                                                                                                                                                                                                                                                                                                                                                                                                       |
|---------------------------------|-------------------------------------------------------------------------------------------------------------------------------------------------------------------------------------------------------------------------------------------------------------------------------------------------------------------------------------------------------------------------------------------------------------------------------------------------------------------------------------------------------------------------------------------------------------------------------------------------------|
| Journal:                        | <i>BMJ Open</i>                                                                                                                                                                                                                                                                                                                                                                                                                                                                                                                                                                                       |
| Manuscript ID                   | bmjopen-2019-033397.R1                                                                                                                                                                                                                                                                                                                                                                                                                                                                                                                                                                                |
| Article Type:                   | Original research                                                                                                                                                                                                                                                                                                                                                                                                                                                                                                                                                                                     |
| Date Submitted by the Author:   | 20-Dec-2019                                                                                                                                                                                                                                                                                                                                                                                                                                                                                                                                                                                           |
| Complete List of Authors:       | Griauzde, Dina; VA Ann Arbor Healthcare System; University of Michigan Medical School<br>Saslow, Laura; University of Michigan School of Nursing<br>Patterson, Kaitlyn; University of Michigan Medical School<br>Ansari, Tahoorah; University of Michigan School of Public Health<br>Liestenfeltz, Bradley; University of Michigan School of Nursing<br>Tisack, Aaron; Wayne State University School of Medicine<br>Bihn, Patti; National Kidney Foundation of Michigan<br>Shopinski, Samuel; National Kidney Foundation of Michigan<br>Richardson, Caroline R; University of Michigan Medical School |
| <b>Primary Subject Heading</b>: | Nutrition and metabolism                                                                                                                                                                                                                                                                                                                                                                                                                                                                                                                                                                              |
| Secondary Subject Heading:      | Diabetes and endocrinology                                                                                                                                                                                                                                                                                                                                                                                                                                                                                                                                                                            |
| Keywords:                       | NUTRITION & DIETETICS, DIABETES & ENDOCRINOLOGY, PREVENTIVE MEDICINE                                                                                                                                                                                                                                                                                                                                                                                                                                                                                                                                  |
|                                 |                                                                                                                                                                                                                                                                                                                                                                                                                                                                                                                                                                                                       |

SCHOLARONE™  
Manuscripts



I, the Submitting Author has the right to grant and does grant on behalf of all authors of the Work (as defined in the below author licence), an exclusive licence and/or a non-exclusive licence for contributions from authors who are: i) UK Crown employees; ii) where BMJ has agreed a CC-BY licence shall apply, and/or iii) in accordance with the terms applicable for US Federal Government officers or employees acting as part of their official duties; on a worldwide, perpetual, irrevocable, royalty-free basis to BMJ Publishing Group Ltd ("BMJ") its licensees and where the relevant Journal is co-owned by BMJ to the co-owners of the Journal, to publish the Work in this journal and any other BMJ products and to exploit all rights, as set out in our [licence](#).

The Submitting Author accepts and understands that any supply made under these terms is made by BMJ to the Submitting Author unless you are acting as an employee on behalf of your employer or a postgraduate student of an affiliated institution which is paying any applicable article publishing charge ("APC") for Open Access articles. Where the Submitting Author wishes to make the Work available on an Open Access basis (and intends to pay the relevant APC), the terms of reuse of such Open Access shall be governed by a Creative Commons licence – details of these licences and which [Creative Commons](#) licence will apply to this Work are set out in our licence referred to above.

Other than as permitted in any relevant BMJ Author's Self Archiving Policies, I confirm this Work has not been accepted for publication elsewhere, is not being considered for publication elsewhere and does not duplicate material already published. I confirm all authors consent to publication of this Work and authorise the granting of this licence.

1  
2  
3 **1 A Mixed Methods Pilot Study of a Low-Carbohydrate Diabetes Prevention Program Among Adults**  
4 **2 with Prediabetes in the US**  
5  
6  
7  
8  
9  
10  
11  
12  
13

5 Dina Hafez Griauzde<sup>1,2,3</sup>, MD, MSc; Laura Saslow<sup>3,4</sup>, PhD; Kaitlyn Patterson<sup>2</sup>, BS; Tahoorah Ansari<sup>5</sup>,  
6 MPH; Bradley Liestenfeltz<sup>4</sup>, BSN, RN; Aaron Tisack<sup>6</sup>, BS; Patti Bihn<sup>7</sup>, BSN, RN; Samuel Shopinski<sup>7</sup>,  
7 MMS; Caroline R. Richardson<sup>2,3</sup>, MD  
8  
9

10 <sup>1</sup>VA Ann Arbor Healthcare System, Ann Arbor, MI, USA

11 <sup>2</sup>University of Michigan Medical School, Ann Arbor, MI, USA

12 <sup>3</sup>University of Michigan Institute for Healthcare Policy and Innovation, Ann Arbor, MI, USA

13 <sup>4</sup>University of Michigan School of Nursing, Ann Arbor, MI, USA

14 <sup>5</sup>University of Michigan School of Public Health, Ann Arbor, MI, USA

15 <sup>6</sup>Wayne State University School of Medicine, Detroit, MI, USA

16 <sup>7</sup>National Kidney Foundation of Michigan, Ann Arbor, MI, USA  
17  
18

18 **Corresponding Author:**

19 Dina H. Griauzde MD, MSc

20 2800 Plymouth Road, Building 16, Room 16-371C

21 Ann Arbor, MI 48109-2800

22 Phone: 603-860-1066

23 Email: dhafez@med.umich.edu  
24  
25

25 Word count: 4613

26 Tables: 3

27 Figures: 0  
28  
29  
30  
31  
32  
33  
34  
35  
36  
37  
38  
39  
40  
41  
42  
43  
44  
45  
46  
47  
48  
49  
50  
51  
52  
53  
54  
55  
56  
57  
58  
59  
60

1  
2  
3 **28 ABSTRACT**

4  
5 **29 Objectives:** (1) To estimate weight change from a Low-Carbohydrate Diabetes Prevention Program (LC-  
6  
7 **30 DPP**); (2) To evaluate the feasibility and acceptability of a LC-DPP.

8  
9 **31 Research Design:** Single-arm, mixed methods (i.e., integration of quantitative and qualitative data) pilot  
10  
11 **32 study.**

12  
13 **33 Setting:** Primary care clinic within a large academic medical center in the US.

14  
15 **34 Participants:** Adults with prediabetes and body mass index  $\geq 25$  kg/m<sup>2</sup>.

16  
17 **35 Intervention:** We adapted the Center for Disease Control and Prevention's National Diabetes Prevention  
18  
19 **36 Program (NDPP)**—an evidence-based, low-fat dietary intervention—to teach participants to follow a very  
20  
21 **37 low-carbohydrate diet (VLCD).** Participants attended 23 group-based classes over 1 year.

22  
23 **38 Outcome Measures:** Primary outcome measures were (1) weight change; (2) percentage of participants  
24  
25 **39 who achieved  $\geq 5\%$  weight loss.** Secondary outcome measures included intervention feasibility and  
26  
27 **40 acceptability (e.g, attendance; qualitative interview feedback).**

28  
29 **41 Results:** Our enrollment target was 22. One person dropped out before a baseline weight was obtained;  
30  
31 **42 data from 21 individuals were analyzed.** Mean (SD) weight loss in kilograms was 4.3(4.8) at 6 months  
32  
33 **43 and 4.9(5.8) at 12 months.** Mean (SD) percent body weight change was 4.5 (5.0) at 6 months and 5.2 (6.0)  
34  
35 **44 at 12 months; 8/21 individuals (38%) achieved  $\geq 5\%$  weight loss at 12 months.** Mean attendance was  
36  
37 **45 10.3/16 weekly sessions and 3.4/7 bi-weekly or monthly sessions.** Among interviewees (n=14), 3 factors  
38  
39 **46 facilitated VLCD adherence:** (1) enjoyment of low-carbohydrate foods; (2) diminished hunger and  
40  
41 **47 cravings;** and (3) health benefits beyond weight loss. Three factors hindered VLCD adherence: (1)  
42  
43 **48 enjoyment of high-carbohydrate foods;** (2) lack of social support; and (3) difficulty pre-planning meals.  
44  
45 **49 Conclusions:** A LC-DPP is feasible, acceptable, and may be an effective option to help individuals with  
46  
47 **50 prediabetes to lose weight.** Data from this pilot will be used to plan a fully-powered randomized  
48  
49 **51 controlled trial of weight loss among NDPP vs. LC-DPP participants.**

50  
51  
52 **52 Trial Registration:** NCT03258918, ClinicalTrials.gov  
53  
54  
55  
56  
57  
58  
59  
60

1  
2  
3 54  
4  
5

6 55

**Strengths and Limitations**8  
9 5611  
12 57

- This is the first study to explore a dietary strategy to augment the weight loss effectiveness of the Center for Disease Control and Prevention's National Diabetes Prevention Program (NDPP).
- Mean weight loss among LC-DPP participants was greater than mean weight loss among historical NDPP controls.
- A Low-Carbohydrate Diabetes Prevention Program (LC-DPP) was feasible and acceptable among participants.
- This was a single-arm pilot study.
- Outcomes beyond 12 months were not examined.

## INTRODUCTION

1  
2  
3 58  
4  
5  
6 59 An estimated 84 million U.S. adults have prediabetes and face an elevated risk of developing  
7  
8 60 Type 2 Diabetes Mellitus (T2DM) (1). Fortunately, individuals with prediabetes can prevent progression  
9  
10 61 to T2DM. The landmark Diabetes Prevention Program (DPP) Trial demonstrated a 58 percent reduction  
11  
12 62 in the 3-year incidence of T2DM among individuals with prediabetes who achieved at least 7 percent  
13  
14 63 body weight loss through diet and physical activity changes (2). Accordingly, the Centers for Disease  
15  
16 64 Control and Prevention (CDC) adapted the DPP's individual lifestyle intervention to a group-based  
17  
18 65 program, which is now available in communities across the United States (3,4) and covered by a growing  
19  
20 66 number of health plans, including Medicare (5).

21  
22  
23 67 Although the DPP is the prevailing public health strategy for T2DM, rates of program uptake and  
24  
25 68 engagement are very low (6–8) and only 35% of real-world DPP participants achieve goal weight loss of  
26  
27 69 at least 5% (4). A variety of efforts aim to augment DPP uptake and engagement, including public health  
28  
29 70 campaigns to increase individuals' prediabetes risk awareness (9), initiatives to encourage primary care  
30  
31 71 providers to identify and treat patients with prediabetes (10), and online and mobile health program  
32  
33 72 adaptations to accommodate differences in individuals' needs and preferences (11). In contrast, no  
34  
35 73 efforts, to our knowledge, specifically aim to increase the DPP's weight-loss effectiveness. Yet, doing so  
36  
37 74 is critical, as weight loss is the key driver of T2DM risk reduction (12), and insurance payment hinges, in  
38  
39 75 part, on participants' achievement and maintenance of at least 5% body weight loss (5).

40  
41  
42 76 One promising strategy to increase the DPP's weight loss effectiveness may be to change the  
43  
44 77 program's dietary advice. The DPP was developed in the 1990s and thus teaches individuals to follow a  
45  
46 78 low-fat, calorie-restricted diet, as this was the contemporaneous recommendation for healthy eating (13).  
47  
48 79 However, the scientific merit of this recommendation has been criticized (14). Growing evidence supports  
49  
50 80 the efficacy of low-carbohydrate diets (defined <26% total energy from carbohydrate per day) and very  
51  
52 81 low-carbohydrate diets (VLCDs; defined as <10% of total energy from carbohydrate per day) (15) for  
53  
54  
55  
56  
57  
58  
59  
60



1  
2  
3 82 short-term weight loss (16–18), long-term weight maintenance (19–21), and improved glycemic control,  
4  
5 83 particularly among individuals with T2DM and insulin resistance (15,22,23).  
6

7 84 Several prior studies have effectively used VLCDs to promote weight loss among patients with  
8  
9 85 prediabetes (24,25). Such interventions are often costly due to their use of individualized weight loss  
10  
11 86 treatment and follow-up plans and subspecialty care, which limits their ability to be scaled. In contrast,  
12  
13 87 the NDPP uses non-medical coaches to deliver the program in a variety of community-based settings (26).  
14  
15 88 Accordingly, we hypothesized that a low-carbohydrate Diabetes Prevention Program (LC-DPP) may be  
16  
17 89 better for weight loss and T2DM prevention than the traditional, low-fat DPP, and, if effective, a LC-DPP  
18  
19 90 could be readily scaled using lay educators and existing DPP infrastructure and systems for monitoring  
20  
21 91 and ensuring program fidelity (27). This mixed methods pilot study has two aims: (1) to estimate weight  
22  
23 92 change from a LC-DPP; and (2) to test the feasibility and acceptability of the intervention. These data will  
24  
25 93 enable us to refine both the LC-DPP intervention and the methods and procedures (e.g., recruitment,  
26  
27 94 retention processes) in anticipation of conducting a fully-powered randomized controlled trial of weight  
28  
29 95 loss among NDPP vs. LC-DPP participants.  
30  
31  
32

## 33 96 **METHODS**

34  
35 97 We conducted a single-arm pilot study to estimate weight change from a LC-DPP and to examine  
36  
37 98 the intervention's feasibility and acceptability among adults with prediabetes. We used a mixed methods  
38  
39 99 sequential explanatory study design (28); quantitative data were collected at baseline, 6-months, and 12-  
40  
41 100 months; qualitative data were collected at 6-months and 12-months. Integration(29) of quantitative and  
42  
43 101 qualitative data occurred after the study period when we merged our quantitative and qualitative data. The  
44  
45 102 rationale for this approach is that quantitative data provides a general overview of the intervention's  
46  
47 103 efficacy and limitations, and qualitative data help to explain these findings by exploring participants'  
48  
49 104 experiences and perspectives in more depth (30).  
50  
51

52 105 The study was approved by the University of Michigan Institutional Review Board and conducted  
53  
54 106 from August 2017 to October 2018.  
55  
56  
57  
58  
59  
60

### 107 *Setting and Participants*

108 Michigan Medicine has 14 adult primary care clinics throughout Southeast Michigan that serve  
109 approximately 240,000 patients with racial/ethnic characteristics similar to 2016 U.S. Census Data  
110 estimates for the state of Michigan (80% White, 14% African-American, 5% Latino, 3% Asian) (31).  
111 Approximately 70% of Michigan Medicine patients have commercial insurance and approximately 30%  
112 have federal insurance (e.g., Medicare, Medicaid). We conducted this study at one outpatient clinic with a  
113 demographic and payor mix similar to that of the health system.

114 Inclusion criteria were: (1) overweight, defined as body mass index (BMI)  $\geq 25$  kg/m<sup>2</sup> (32); (2)  
115 hemoglobin A1c (HbA1c) between 5.7-6.4% drawn within 6 months of the study start date; (3)  
116 willingness to participate in group-based classes; and (4) ability to engage in at least light physical  
117 activity. Exclusion criteria were: (1) history of type 1 diabetes or type 2 diabetes; (2) current participation  
118 in another lifestyle or behavior change program or research study; (3) following a vegetarian or vegan  
119 dietary pattern; (4) inability to read, write, or speak English; (5) inability to provide informed consent; or  
120 (6) pregnant or intention to become pregnant during the intervention period. We used an Electronic  
121 Health Record (EHR) reporting tool to identify individuals who met study eligibility criteria. A study  
122 invitation letter was sent to 187 individuals. Individuals interested in study participation emailed the study  
123 team and were then screened by telephone to ensure they met study eligibility criteria. Informed consent  
124 was obtained electronically using RedCap, a secure survey platform (33).

### 125 *Intervention*

126 The CDC offers two approved DPP curricula: (1) 2012 National Diabetes Prevention Program  
127 (NDPP) and (2) *Prevent T2* (27). While *Prevent T2* is a newer program iteration, it has not been  
128 evaluated in peer-reviewed literature (4) and its effectiveness as compared to the 2012 NDPP is unknown.  
129 To facilitate comparison between our LC-DPP and published data on community-based DPPs, we  
130 modified the CDC's NDPP rather than *Prevent T2*.

131 The NDPP curriculum consists of 16-weekly sessions delivered over 6 months (i.e., core phase)  
132 followed by 6-8 bimonthly or monthly sessions (i.e., maintenance phase). In addition to teaching

1  
2  
3 133 participants to follow a low-fat diet, the program also instructs individuals to engage in at least 150  
4  
5 134 minutes of moderate intensity physical activity per week and to use behavioral strategies (e.g., problem  
6  
7 135 solving) to maintain lifestyle changes over time.  
8

9 136 We adapted the NDPP's dietary advice to teach participants to follow a VLCD, restricting  
10  
11 137 carbohydrate intake (not including fiber) to 20-35 grams per day during the program's core phase (i.e.  
12  
13 138 weeks 1-16). We did not substantially alter the content of NDPP sessions focused on non-dietary topics  
14  
15 139 such as exercise. While the NDPP curriculum teaches to participants to initiate adherence to a low-fat diet  
16  
17 140 during Session #2, we designed the curriculum to gradually ease individuals into the low-carbohydrate  
18  
19 141 diet for two key reasons. First, we recognized that this dietary change may be drastic for individuals  
20  
21 142 accustomed to consuming high-carbohydrate meals. Accordingly, we desired to increase individuals'  
22  
23 143 competency and self-efficacy through step-by-step introduction of the meal plan, as these constructs have  
24  
25 144 been associated with dietary adherence and favorable changes in health habits in other behavior change  
26  
27 145 studies (34). Second, when transitioning to a very low carbohydrate meal plan, individuals may  
28  
29 146 experience side effects such as headache, constipation, muscle cramps, diarrhea, general weakness (i.e.,  
30  
31 147 "keto flu"); a more gradual reduction in carbohydrate intake can reduce the likelihood that individuals  
32  
33 148 experience these symptoms. During session #2, participants were instructed to replace typical breakfast  
34  
35 149 and snack foods with low-carbohydrate options. During sessions #3 and #4, they were instructed to  
36  
37 150 replace lunch and dinner foods, respectively, with low-carbohydrate options. As part of these sessions,  
38  
39 151 participants were also advised about strategies to mitigate potential side effects (e.g., increase water and  
40  
41 152 salt intake if experiencing headache; increase intake of water and non-starchy vegetables if experiencing  
42  
43 153 constipation). Allowable foods included: meats, fish, poultry, eggs, cheese, seeds, nuts, leafy greens,  
44  
45 154 non-starchy vegetables, and some fruits (e.g., berries). Participants were also taught to use low-  
46  
47 155 carbohydrate substitutes when cooking or baking (e.g., almond flour in place of wheat flour).  
48  
49  
50

51 156 During the LC-DPP's maintenance phase, participants were instructed to gradually reintroduce  
52  
53 157 carbohydrates (e.g., 5 non-fiber grams of carbohydrates per week) if: (1) they had met their weight loss  
54  
55 158 target and (2) if they desired to liberalize their carbohydrate intake. Consistent with NDPP operating  
56  
57  
58  
59  
60

1  
2  
3 159 procedures, LC-DPP participants were asked to maintain daily food logs; these were submitted to the  
4  
5 160 lifestyle coach at each session and then returned to participants with written feedback on food choices at  
6  
7 161 the following session.  
8

9 162 We partnered with the National Kidney Foundation of Michigan (NKFM), a local leader in  
10  
11 163 community-based NDPP delivery. We trained an experienced NKFM lifestyle coach to deliver the LC-  
12  
13 164 DPP. Training consisted of: (1) the coach's self-guided review of LC-DPP materials and online low-  
14  
15 165 carbohydrate resources; (2) in-person training with the coach and study team, totaling approximately 4  
16  
17 166 hours; and (3) assessment of the coach's low-carbohydrate knowledge using a 22-item survey (Appendix  
18  
19 167 1). During the training period, our coach adapted her personal eating habits to adhere to a low-  
20  
21 168 carbohydrate meal plan; she continued this eating pattern throughout the study period.  
22  
23

24 169 Participants' primary care physicians (PCPs) were notified via HIPPA-compliant messaging that  
25  
26 170 their patient(s) was/were participating in this study. PCPs received written material about the study as  
27  
28 171 well as potential side effects of low-carbohydrate diets and management strategies (e.g., magnesium for  
29  
30 172 muscle cramps).  
31  
32

33 173  
34 174 *Primary Measures: Weight change*

35  
36 175 (1) Change in body weight at 6 months and 12 months: Body weight was measured and recorded at each  
37  
38 176 attended session. Among session non-attendees, we attempted to schedule 6- and 12-month weigh-ins  
39  
40 177 at participants' convenience. We calculated average body weight change and percent body weight  
41  
42 178 change at 6 months and 12 months compared to baseline. All weights were obtained using a  
43  
44 179 calibrated scale.  
45

46 180 (2) Percentage of participants who achieved  $\geq 5\%$  body weight loss: At 6 months and 12 months, we  
47  
48 181 determined the percentage of participants who achieved goal weight loss by dividing the number of  
49  
50 182 individuals who achieved  $\geq 5\%$  body weight loss by the number of study enrollees with baseline  
51  
52 183 weight data (n=21). We similarly calculated the percentage of participants who achieved 10% body  
53  
54 184 weight loss at each time point.  
55  
56  
57  
58  
59  
60

185

186 *Secondary Measures:*

187 Intervention feasibility and acceptability: Measures of feasibility and acceptability were uptake, session  
188 attendance, and study retention rates. LC-DPP uptake rate was defined as the number of participants who  
189 enrolled in the intervention divided by the total number of individuals invited to participate.

190 Session attendance was determined by calculating the rate of attendance at core and maintenance  
191 sessions. Rates of session attendance were compared with the CDC's Diabetes Prevention Recognition  
192 Program (DPRP) standards (27). The DPRP monitors the fidelity and quality of community-based DPPs,  
193 and requires that at least 60% of program participants attend  $\geq 9$  core sessions and  $\geq 3$  maintenance  
194 sessions. We aimed to achieve these session attendance metrics to demonstrate LC-DPP feasibility.

195 LC-DPP retention rate was determined by calculating the rate of completion of the 6-month and  
196 12-month surveys. Although session attendance is commonly used as a measure of intervention retention  
197 in larger trials, we observed that several participants in this small pilot study could not attend sessions due  
198 to personal and/or professional circumstances. However, they remained in periodic communication with  
199 the lifestyle coach, received course materials by e-mail, and completed assessments at 6 and 12 months.  
200 Accordingly, we felt that survey completion was the most accurate representation of study retention in  
201 this small sample.

202 To further understand the program's acceptability, we conducted semi-structured interviews at 6  
203 and 12 months. During interviews, we explored participants' general experiences with the intervention as  
204 well as specific facilitators of and barriers to VLCD adherence. The 6-month interview guide is shown in  
205 Appendix 2.

206 Change in HbA1c: Baseline HbA1c was identified according to study inclusion criteria and abstracted  
207 from the electronic health record (EHR). Primary care physicians were notified that their patient(s)  
208 was/were participating in this intervention and they were asked to order HbA1c at 6 and 12 months.  
209 Change in HbA1c was calculated by subtracting participants' HbA1c at 6 and 12 months from baseline  
210 values.

1  
2  
3 211 Online Surveys: At baseline, 6 months, and 12 months, study participants were invited to complete an  
4  
5 212 online survey via RedCap (33). At baseline, participants were asked to provide demographic and  
6  
7 213 socioeconomic information. In each survey, we assessed participants' experiences of physical symptoms,  
8  
9 214 which are known to be potential side effects of VLCs. These include: bad breath, acne, gastrointestinal  
10  
11 215 symptoms (e.g. constipation, diarrhea), dizziness, dry mouth, excessive thirst, headaches, and muscle  
12  
13 216 cramps. Survey response options were: not at all; 1 day a week; 2-3 days a week; 4-5 days a week; and 6-  
14  
15 217 7 days a week.

### 18 218 *Exploratory Analysis*

19  
20  
21 219 We examined participants' weight changes stratified by 12-month survey completion (i.e., study  
22  
23 220 retention).

### 25 221 *Sample Size*

26  
27  
28 222 Consistent with CONSORT guidelines(35) and other expert recommendations for designing pilot studies  
29  
30 223 (36–38), our sample size was selected based on pragmatic considerations with the goal of generating  
31  
32 224 sufficient data to inform a fully powered RCT. Specifically, NKFM typically enrolls 15-20 individuals in  
33  
34 225 their programs and the clinic's conference room has capacity for approximately 25 individuals. We  
35  
36 226 specified an enrollment target to 22 individuals, as we believed this would maintain the group dynamic of  
37  
38 227 NKFM's traditional DPPs while also allowing us to sufficiently test the feasibility of the methods and  
39  
40 228 procedures (e.g., recruitment, retention) that we are likely to use in a fully powered RCT (35).

### 43 229 *Analysis*

#### 46 230 *Quantitative analysis*

47  
48  
49 231 Descriptive statistics were used for baseline survey response data, including demographic and  
50  
51 232 socioeconomic characteristics and self-reported side effects. For all continuous outcomes, including body  
52  
53 233 weight and HbA1c, we calculated mean change and standard deviation from baseline to 6 months and 12  
54  
55 234 months. Given our small sample and non-normal distribution of the data, we used a nonparametric

1  
2  
3 235 statistical test, the Wilcoxon matched-pairs sign-rank test, to compare pre-post changes in the frequencies  
4  
5 236 of participants' self-reported physical symptoms at 6 and 12 months compared to baseline. All analyses  
6  
7 237 were conducted using Stata 14.  
8  
9

### 10 238 *Qualitative analysis*

11  
12  
13 239 Semi-structured interviews were recorded and transcribed verbatim. Interviews were imported into  
14  
15 240 qualitative analysis software. Two investigators independently read and coded transcribed interviews.  
16  
17 241 Interviews were then coded jointly using consensus conferences. Interviews were analyzed using directed  
18  
19 242 content analysis, meaning the codes were created to reflect the main topics in the interview guide and to  
20  
21 243 characterize the patterns and themes that emerged from the data (39).  
22  
23

### 24 244 *Integrated analysis*

25  
26  
27 245 Integration—the mixing of quantitative and qualitative data (29)—occurred after the study period. We  
28  
29 246 merged qualitative data with weight loss data to better understand the factors that might have influenced  
30  
31 247 weight loss outcomes.  
32  
33

### 34 248 Patient and public involvement

35  
36  
37 249 There was no patient or public involvement in the development of this pilot study. Rather, we sought  
38  
39 250 feedback from study participants. These results will be used to refine the intervention for a larger-scale  
40  
41 251 trial, which will also be informed by stakeholder groups, including patients with prediabetes, primary care  
42  
43 252 team members, and community partners (e.g., NKFM).  
44

## 45 253 **RESULTS**

46  
47  
48 254 Intervention uptake: A total of 187 potentially eligible individuals were sent study invitation letters via  
49  
50 255 postal mail. Thirty-two individuals (17%) expressed interest in study participation and 22 (12%) enrolled  
51  
52 256 in the study within two weeks. Reasons for non-enrollment included: unable to reach (n=4); active  
53  
54 257 participation in another weight loss intervention (n=2); unwilling or unable to participate in group classes  
55  
56  
57  
58  
59  
60

258 or follow VLCD (n=3). One person was placed on a waitlist because we met our recruitment target  
259 (n=22), which was determined by room-size constraints. One participant dropped out of the study before a  
260 baseline weight could be obtained and was therefore excluded from our analyses.

### 261 **Baseline Characteristics**

262 Demographic and socioeconomic characteristics were assessed at baseline (**Table 1**). Most participants  
263 were males (57%), white (86%), and educated, with 85% attaining education beyond high school. The  
264 mean age was 58.9 years (SD 11.0). At baseline, mean BMI was 34.1 kg/m<sup>2</sup> (SD 5.4) and mean HbA1c  
265 level was 5.9% (SD 0.22%).

### 266 **Quantitative Analyses:**

267 Change in weight and HbA1c level: **Table 2** shows weight and HbA1c outcomes at 6 and 12 months  
268 among all participants (n=21) and among those who completed the 12-month survey (n=15). No  
269 participants progressed to T2DM, defined by HbA1c > 6.4%, during the study period.

270 Retention: Eighteen out of 21 participants completed the 6-month survey and 15 completed the 12-month  
271 survey, resulting in a retention rates of 86% and 71%, respectively.

272 Session attendance: Participants attended a mean (SD) of 10.3 core sessions and 3.4 (2.7) maintenance  
273 sessions. Fourteen participants (67%) attended at least 9 core sessions and 11 participants (52%) attended  
274 at least 3 maintenance sessions.

275 Change in self-reported physical symptoms: There was an increase in self-reported constipation from  
276 baseline to 6 months (p=0.006). There was a decrease in muscle cramps from baseline to 6 months  
277 (p=0.005) and a decrease in physical weakness from baseline to 6 months (p=0.05) and 12 months  
278 (p=0.05). There were no other statistically significant differences in self-reported side effects at 6 or 12  
279 months compared to baseline.

### 280 **Adverse Events:**

281 One participant suffered an ischemia stroke during the program's core phase.

### 282 **Qualitative Analyses:**

283 *Participant Experiences with the Intervention*



1  
2  
3 284 Fourteen individuals participated in semi-structured interviews; 13 participated at 6 months and  
4  
5 285 12 participated at 12 months. During these interviews, we explored participants' experiences with the  
6  
7 286 program, including barriers to and facilitators of adhering to a low-carbohydrate meal plan. At 12 months,  
8  
9 287 we also explored participants' plans to continue to follow a low-carbohydrate meal plan. These qualitative  
10  
11 288 data were integrated with interviewees' weight change data to better elucidate factors that may influence  
12  
13 289 participants' weight change.

14  
15  
16 290 Over half (n=8, 57%) of interviewees were female. Other baseline characteristics were similar  
17  
18 291 between interviewees and non-interviewees (**Table 1**). At 12 months, mean (SD) percent body weight  
19  
20 292 loss among interviewees was 7.0 (6.5) percent. Half (n=7) of interviewees achieved the program goal of  
21  
22 293  $\geq 5\%$  body weight loss at 12 months. **Table 3** shows key themes and representative quotes stratified by  
23  
24 294 weight goal achievers and non-achievers.

25  
26 295 Among weight goal achievers (n=7), three key themes emerged that facilitated adherence to the  
27  
28 296 low-carbohydrate meal plan: (1) enjoyment of low-carbohydrate foods; (2) diminished hunger; and  
29  
30 297 cravings (3) health benefits beyond weight loss.

31  
32  
33 298 The majority of weight goal achievers (n=5) found the meal plan easy to follow due to  
34  
35 299 palatability of the diet and availability of low-carbohydrate substitutes for foods such as potatoes and rice.  
36  
37 300 One participant noted, "In the lunch time, I'll substitute [sandwich bread] with a low-carb wrap. There's a  
38  
39 301 4-gram wrap that I could use...The only thing you're replacing at dinner time from a carb standpoint  
40  
41 302 would be maybe some potatoes or pastas, and [there are] really great substitutes...there's a low-carb pasta  
42  
43 303 option. And then of course [there's] cauliflower mashed potato. When you are doing something like a  
44  
45 304 taco salad with cheese and meat and sour cream and salsa, all of that fits [in the meal plan]."

46  
47 305 Over half (n=4) of weight goal achievers noted diminished hunger and cravings. For example,  
48  
49 306 one participant commented, "I just love that I'm losing weight. It's the best diet I have ever been on, and  
50  
51 307 I've been on a lot. And it seems effortless, it just seems like it's melting off. And I'm eating good and I'm  
52  
53 308 not hungry..." Another noted, "When I eat a higher fat diet, I'm not hungry. And that's been a big surprise  
54  
55 309 to me." One weight goal non-achiever endorsed diminished hunger when she adhered to the low-carb

1  
2  
3 310 meal plan; however, she also described social pressures to consume carbohydrates and non-adherence to  
4  
5 311 the intervention at least 1-2 days per week.

6  
7 312 Almost all (n=6) weight goal achievers experienced health benefits in addition to weight loss,  
8  
9 313 which motivated their continued adherence to the low-carbohydrate meal plan. Several participants  
10  
11 314 described increased energy levels and improved sleep. One stated, “[I was able] to decrease my blood  
12  
13 315 pressure medications... [I’m] someone who's been on high blood pressure medication for probably 15, 20  
14  
15 316 years, now it's cut in half, so that's significant.”

16  
17  
18 317 Among weight goal non-achievers (n=7), three key themes emerged that hindered adherence to  
19  
20 318 the low-carbohydrate meal plan: (1) difficulty giving up high-carbohydrate foods; (2) lack of social  
21  
22 319 support; and (3) difficulty planning ahead.

23  
24 320 The majority of weight goal non-achievers (n=5) described difficulty giving up carbohydrates due  
25  
26 321 to food preferences, and this was a particular challenge in the absence of social support. One participant  
27  
28 322 commented, “The hardest [part is that] it's so much fun to go out for ice cream with my friends or just to  
29  
30 323 go to a restaurant. And I don't like to have to order a salad or something... It's just kinda hard I guess,  
31  
32 324 being around other people who are eating stuff that I shouldn't have.” Another commented, “I live with  
33  
34 325 somebody who eats things that I should not have. And it's become very difficult to resist those, especially  
35  
36 326 as I go farther and farther into the program.” In contrast, only one weight goal achiever noted difficulty  
37  
38 327 giving up carbohydrates. However, this challenge was mitigated by the support of a spouse who also  
39  
40 328 adhered to the meal plan: “The hardest thing for me, personally, is that I love bread, and I love potato,  
41  
42 329 [but] as long as [my spouse and I] are working together on this, we're great.”

43  
44  
45 330 Several weight goal non-achievers (n=3) described difficulty with planning low-carbohydrate  
46  
47 331 meals. One noted, “Probably the [biggest challenge] is the pre-planning that you have to do... [when] I  
48  
49 332 was going grocery shopping, I had meals planned, and... I was doing much better than if I run out of food  
50  
51 333 and I'm hungry and I just want something now.”

52  
53  
54 334 Almost half (n=6) the interviewees expressed concern about potential adverse health  
55  
56 335 consequences of increased dietary fat intake, including heart disease and elevated cholesterol levels. One  
57  
58  
59  
60

1  
2  
3 336 participant stated, “For years and years and years, I’ve heard eating red meats, cheeses, and nuts, and low  
4  
5 337 carbohydrate foods...is not good for your coronary system, your heart. You gotta understand the last 50  
6  
7 338 years, [all I heard] was...sausage and steak and hamburger, and pork chops are not good for you. They’re  
8  
9 339 not good for your heart. But now it seems like things are changing. That’s the only thing that bothers me.  
10  
11 340 Otherwise, it’s working great.”

## 14 341 **DISCUSSION**

17 342 This is the first study, to our knowledge, that aims to augment the weight loss effectiveness of the  
18  
19 343 CDC’s NDPP by modifying the program’s dietary advice. Specifically, participants were taught to follow  
20  
21 344 a carbohydrate-restricted rather than a fat-restricted meal plan. At 12 months, percent body weight loss  
22  
23 345 among all LC-DPP participants was greater than weight loss among historical NDPP controls (5.2%  
24  
25 346 versus 4.2%) and a similar number of LC-DPP participants achieved at least 5% body weight loss (38%  
26  
27 347 versus 35%) (4). Meta-analyses of NDPPs demonstrate a positive association between session attendance  
28  
29 348 and body weight loss (4,26). Due to sample size limitations, we were unable to evaluate the relationship  
30  
31 349 between LC-DPP attendance and body weight change. However, among our sample, weight change was  
32  
33 350 greater among survey completers (n=15) as compared to survey non-completers at 6 months (6.2% versus  
34  
35 351 4.5%) and 12 months (6.4% vs. 5.2%).

38 352 Twelve percent (n=22) of eligible individuals enrolled in our study within 2 weeks of receiving  
39  
40 353 an invitation letter. LC-DPP participation was slightly higher than that observed in traditional DPPs (6–  
41  
42 354 8), including those offered by our institution’s self-funded health plan (40). Given room-size limitations  
43  
44 355 and the pilot nature of this study, we ceased recruitment efforts once we met our enrollment target and we  
45  
46 356 may therefore be underestimating potential LC-DPP participation. Over half of LC-DPP participants were  
47  
48 357 male while the majority of NDPP participants are female (4). Study retention, as measured by survey  
49  
50 358 completion, was high (85%, n=18) at 6 months and decreased at 12 months (71%, n=15). Similarly,  
51  
52 359 attendance at LC-DPP core sessions was high, meeting CDC DPRP standards (27) with 67% (n=14)  
53  
54 360 attending at least 9 core sessions; attendance decreased during the program’s maintenance phase with  
55  
56  
57  
58  
59  
60

1  
2  
3 361 only 52% (n=11) attending at least 3 maintenance sessions. Notably, rates of attrition are often high in  
4  
5 362 real-world behavioral health interventions, including traditional DPPs where approximately half of  
6  
7 363 participants remain engaged with the intervention at 6 months (4,41). Accordingly, by CDC DPRP  
8  
9 364 standards and in comparison to real-world DPPs, our findings suggest that an LC-DPP is feasible.  
10  
11 365 Additional strategies (e.g., incentives, varied class times) could be explored to augment participants'  
12  
13 366 session attendance.

14  
15  
16 367 During qualitative interviews, we explored facilitators of and barriers to low-carbohydrate dietary  
17  
18 368 adherence. These data not only provide insight into the factors that may influence individuals' weight  
19  
20 369 change outcomes, but also reveal potential opportunities to refine and tailor the intervention. For example,  
21  
22 370 consistent with prior literature (42), our participants identified social support as a key factor in dietary  
23  
24 371 adherence, suggesting that LC-DPP partner classes and/or peer-support programs may be one strategy to  
25  
26 372 augment program adherence. Furthermore, interviewees that achieved goal weight loss described  
27  
28 373 enjoyment of the low-carbohydrate diet as compared to weight goal non-achievers who struggled to give  
29  
30 374 up the carbohydrate-rich foods that they loved. Participants that do not adhere to the low-carbohydrate  
31  
32 375 meal plan due to non-enjoyment of allowable foods may benefit from other evidence-based interventions  
33  
34 376 for T2DM prevention (e.g., traditional DPP, metformin) or for weight loss (e.g., Weight Watchers,  
35  
36 377 pharmacotherapy, bariatric surgery), and these alternatives should be readily offered.

37  
38  
39 378 The majority of interviewees expressed fear regarding the diet's fat content, reflecting the widely-  
40  
41 379 held belief that dietary fat and cholesterol increase cardiovascular disease risk. While observational data  
42  
43 380 demonstrating this association emerged in the 1950s (43), the causative role of dietary saturated fat and  
44  
45 381 cholesterol in heart disease is not well-established (44). Furthermore, the Women's Health Initiative, the  
46  
47 382 largest randomized controlled trial to evaluate health outcomes of low-fat diet adherence, showed no  
48  
49 383 reduction in cardiovascular disease risk among intervention versus control group participants (45).  
50  
51 384 Growing literature demonstrates favorable changes in cardiovascular disease risk factors (e.g., blood  
52  
53 385 pressure) and serum biomarkers (e.g., LDL, HDL, and triglycerides) among individuals following low-  
54  
55 386 carbohydrate, high-fat diets (15,16,18,21). Accordingly, the 2015-2020 U.S. Dietary Guidelines removed

1  
2  
3 387 prior recommended limits on dietary fat and cholesterol intake, and clinical practice guidelines for T2DM  
4  
5 388 (46) and obesity management (47) now endorse carbohydrate restriction as one evidence-based approach  
6  
7 389 to lifestyle management. Despite these changes, however, pervasive fears regarding dietary fat remain one  
8  
9 390 primary barrier to implementation of a LC-DPP. We plan to revise the LC-DPP curriculum to better  
10  
11 391 address participants' concerns and we will test serum lipids in future program evaluations.  
12

### 13 392 **LIMITATIONS**

14  
15 393 First, we recruited individuals from one primary care clinic within a US academic medical center  
16  
17 394 and our results may not be generalizable to other populations. Because the prevalence of prediabetes is  
18  
19 395 increasing worldwide (48), there is a critical need to develop and test novel interventions for T2DM  
20  
21 396 prevention among diverse populations and concomitantly explore what works for whom and under what  
22  
23 397 circumstances (49,50). Second, we did not evaluate outcomes beyond 12 months, and are therefore unable  
24  
25 398 to assess long-term adherence to a carbohydrate-restricted meal plan. Finally, because this was a pilot  
26  
27 399 study, we cannot assess the intervention's weight loss effectiveness compared to the NDPP. A large-scale  
28  
29 400 comparative effectiveness trial of the LC-DPP versus NDPP is warranted.  
30  
31

### 32 401 **CONCLUSIONS**

33  
34 402 The CDC's NDPP is widely available throughout the United States. Yet, many program  
35  
36 403 participants do not achieve the program's weight loss goal of at least 5%. A DPP adapted to teach  
37  
38 404 participants to follow a low-carbohydrate rather than a low-fat diet may be one way to increase the  
39  
40 405 program's weight loss effectiveness and broaden the range of available programs to help individuals with  
41  
42 406 prediabetes. In future work, we aim to test the LC-DPP's weight loss effectiveness as compared to the  
43  
44 407 NDPP in a randomized controlled trial. It is critical to explore issues concerning dietary adherence and  
45  
46 408 sustainability as well as biomarker (e.g., lipid, HbA1c) changes and incident chronic disease (e.g., T2DM,  
47  
48 409 cardiovascular disease) over time. Lastly, future work should explore the factors that facilitate or hinder  
49  
50 410 LC-DPP weight loss success (e.g., presence or absence of social support) and develop tailored strategies  
51  
52 411 that address these factors.  
53  
54  
55  
56  
57  
58  
59  
60

412 **FOOTNOTES**

413 **Contributors:** D.G., L.S., and C.R. designed the study. D.G., L.S., K.P., and A.T. developed the  
414 intervention. K.P., T.A., B.L., P.B., and S.S. collected the data. D.G. and C.R. analyzed the data; they  
415 take full responsibility for the integrity of data analyses. D.G. drafted the manuscript. All authors  
416 critically revised the manuscript.

417  
418 **Funding:** This project was funded by the Michigan Nutrition Obesity Research Center Small Grants  
419 Program (5 P30 DK089503-07). Laura Saslow was supported by funding from the NIH, a K01 from the  
420 National Institute of Diabetes and Digestive and Kidney Diseases (DK107456). The funder had no role in  
421 study design, data collection and analysis, decision to publish, or preparation of the manuscript.

422  
423 **Competing interests:** None declared.

424  
425 **Ethics approval:** The study was approved by the University of Michigan Institutional Review Board.

426  
427 **Data sharing:** De-identified data may be shared pending University of Michigan Institutional Review  
428 Board review and approval. Please email [dhafez@med.umich.edu](mailto:dhafez@med.umich.edu).

429  
430 **Acknowledgements:** The authors thank the National Kidney Foundation of Michigan for their  
431 collaboration in this work and Alison O'Brien, MPH for her careful review of the manuscript.

432  
433  
434 **REFERENCES**

- 435 1. **Gerstein HC, Santaguida P, Raina P, Morrison KM, Balion C, Hunt D, Yazdi H, Booker L.**  
436 Annual incidence and relative risk of diabetes in people with various categories of dysglycemia: A  
437 systematic overview and meta-analysis of prospective studies. *Diabetes Research and Clinical*  
438 *Practice* 2007;78(3):305–312.
- 439 2. **Group DPPR.** Reduction in the Incidence of Type 2 Diabetes with Lifestyle Intervention or  
440 Metformin. *New England Journal of Medicine* 2002;346(6):393–403.
- 441 3. **Vojta D, Koehler TB, Longjohn M, Lever JA, Caputo NF.** A Coordinated National Model for  
442 Diabetes Prevention. *American Journal of Preventive Medicine* 2013;44(4):S301–S306.
- 443 4. **Ely EK, Gruss SM, Luman ET, Gregg EW, Ali MK, Nhim K, Rolka DB, Albright AL.** A  
444 National Effort to Prevent Type 2 Diabetes: Participant-Level Evaluation of CDC's National  
445 Diabetes Prevention Program. *Diabetes Care* 2017;40(10):1331–1341.
- 446 5. **Webinar: Medicare Diabetes Prevention Program - Overview | Center for Medicare &**  
447 **Medicaid Innovation.** Available at: <https://innovation.cms.gov/resources/dpp-overview.html>.  
448 Accessed February 6, 2017.
- 449 6. **Wareham N.** Mind the gap: efficacy versus effectiveness of lifestyle interventions to prevent  
450 diabetes. *The Lancet Diabetes & Endocrinology* 2015;3(3):160–161.
- 451 7. **Jackson SL, Long Q, Rhee MK, Olson DE, Tomolo AM, Cunningham SA, Ramakrishnan U,**  
452 **Narayan KMV, Phillips LS.** Weight loss and incidence of diabetes with the Veterans Health

- 1  
2  
3 453 Administration MOVE! lifestyle change programme: an observational study. *The Lancet Diabetes*  
4 454 & *Endocrinology* 2015;3(3):173–180.  
5  
6 455 8. **Aziz Z, Absetz P, Oldroyd J, Pronk NP, Oldenburg B.** A systematic review of real-world  
7 456 diabetes prevention programs: learnings from the last 15 years. *Implementation Science*  
8 457 2015;10:172.  
9  
10 458 9. **DoIHavePrediabetes.org | Prevent Type 2 Diabetes.** *DoIHavePrediabetes*. Available at:  
11 459 <https://doihaveprediabetes.org/>. Accessed December 16, 2016.  
12  
13 460 10. **Prevent Diabetes STAT | General Public.** *Prevent Diabetes STAT*. Available at:  
14 461 <http://www.preventdiabetesstat.org>. Accessed December 16, 2016.  
15  
16 462 11. **Sepah SC, Jiang L, Peters AL.** Long-Term Outcomes of a Web-Based Diabetes Prevention  
17 463 Program: 2-Year Results of a Single-Arm Longitudinal Study. *J Med Internet Res* 2015;17(4).  
18 464 doi:10.2196/jmir.4052.  
19  
20 465 12. **Hamman RF, Wing RR, Edelstein SL, Lachin JM, Bray GA, Delahanty L, Hoskin M, Kriska**  
21 466 **AM, Mayer-Davis EJ, Pi-Sunyer X, Regensteiner J, Venditti B, Wylie-Rosett J, for the**  
22 467 **Diabetes Prevention Program Research Group.** Effect of Weight Loss With Lifestyle  
23 468 Intervention on Risk of Diabetes. *Diabetes Care* 2006;29(9):2102–2107.  
24  
25 469 13. **1990 Dietary Guidelines - health.gov.** Available at: <https://health.gov/dietaryguidelines/1990.asp>.  
26 470 Accessed June 11, 2019.  
27  
28 471 14. **Teicholz N.** The scientific report guiding the US dietary guidelines: is it scientific? *BMJ*  
29 472 2015:h4962.  
30  
31 473 15. **Feinman RD, Pogozelski WK, Astrup A, Bernstein RK, Fine EJ, Westman EC, Accurso A,**  
32 474 **Frassetto L, Gower BA, McFarlane SI, Nielsen JV, Krarup T, Saslow L, Roth KS, Vernon**  
33 475 **MC, Volek JS, Wilshire GB, Dahlqvist A, Sundberg R, Childers A, Morrison K, Manninen**  
34 476 **AH, Dashti HM, Wood RJ, Wortman J, Worm N.** Dietary carbohydrate restriction as the first  
35 477 approach in diabetes management: Critical review and evidence base. *Nutrition* 2015;31(1):1–13.  
36  
37 478 16. **Saslow LR, Kim S, Daubenmier JJ, Moskowitz JT, Phinney SD, Goldman V, Murphy EJ, Cox**  
38 479 **RM, Moran P, Hecht FM.** A randomized pilot trial of a moderate carbohydrate diet compared to a  
39 480 very low carbohydrate diet in overweight or obese individuals with type 2 diabetes mellitus or  
40 481 prediabetes. *PloS one* 2014;9(4):e91027.  
41  
42 482 17. **Santos FL, Esteves SS, da Costa Pereira A, Yancy Jr WS, Nunes JPL.** Systematic review and  
43 483 meta-analysis of clinical trials of the effects of low carbohydrate diets on cardiovascular risk factors.  
44 484 *Obesity Reviews* 2012;13(11):1048–1066.  
45  
46 485 18. **Hallberg SJ, McKenzie AL, Williams PT, Bhanpuri NH, Peters AL, Campbell WW, Hazbun**  
47 486 **TL, Volk BM, McCarter JP, Phinney SD, Volek JS.** Effectiveness and Safety of a Novel Care  
48 487 Model for the Management of Type 2 Diabetes at 1 Year: An Open-Label, Non-Randomized,  
49 488 Controlled Study. *Diabetes Ther* 2018;9(2):583–612.  
50  
51 489 19. **Nielsen JV, Joensson E.** Low-carbohydrate diet in type 2 diabetes. Stable improvement of  
52 490 bodyweight and glycemic control during 22 months follow-up. *Nutrition & metabolism*  
53 491 2006;3(1):22.  
54  
55  
56  
57  
58  
59

- 1  
2  
3 492 20. **Shai I, Schwarzfuchs D, Henkin Y, Shahar DR, Witkow S, Greenberg I, Golan R, Fraser D,**  
4 493 **Bolotin A, Vardi H, others.** Weight loss with a low-carbohydrate, Mediterranean, or low-fat diet.  
5 494 *New England Journal of Medicine* 2008;359(3):229–241.  
6  
7 495 21. **Athinarayanan SJ, Adams RN, Hallberg SJ, McKenzie AL, Bhanpuri NH, Campbell WW,**  
8 496 **Volek JS, Phinney SD, McCarter JP.** Long-Term Effects of a Novel Continuous Remote Care  
9 497 Intervention Including Nutritional Ketosis for the Management of Type 2 Diabetes: A 2-Year Non-  
10 498 randomized Clinical Trial. *Front. Endocrinol.* 2019;10. doi:10.3389/fendo.2019.00348.  
11  
12 499 22. **Paoli A, Rubini A, Volek JS, Grimaldi KA.** Beyond weight loss: a review of the therapeutic uses  
13 500 of very-low-carbohydrate (ketogenic) diets. *European journal of clinical nutrition* 2013;67(8):789–  
14 501 796.  
15  
16 502 23. **Accurso A, Bernstein RK, Dahlqvist A, Draznin B, Feinman RD, Fine EJ, Gleed A, Jacobs**  
17 503 **DB, Larson G, Lustig RH, Manninen AH, McFarlane SI, Morrison K, Nielsen J, Ravnskov U,**  
18 504 **Roth KS, Silvestre R, Sowers JR, Sundberg R, Volek JS, Westman EC, Wood RJ, Wortman J,**  
19 505 **Vernon MC.** Dietary carbohydrate restriction in type 2 diabetes mellitus and metabolic syndrome:  
20 506 time for a critical appraisal. *Nutrition & Metabolism* 2008;5(1):9.  
21  
22  
23 507 24. **Mckenzie A, Hallberg S, Bhanpuri NH, Athinarayanan SJ, Mccue J, Mccarter JP, Volek J,**  
24 508 **Phinney S.** Continuous Remote Care Model Utilizing Nutritional Ketosis Improves Type 2  
25 509 Diabetes Risk Factors in Patients with Prediabetes. *Diabetes* 2018;67(Supplement 1):293-OR.  
26  
27 510 25. **Gann D, Gann E, Holt RS.** Successful symbiotic partnership between primary care physicians and  
28 511 a disease management program in the treatment of prediabetes. In: ; 2016.  
29 512 doi:10.15406/jdmdc.2016.3.00089.  
30  
31 513 26. **M. K. Ali, J. B. Echouffo-Tcheugui, D. F. Williamson.** How Effective Were Lifestyle  
32 514 Interventions In Real-World Settings That Were Modeled On The Diabetes Prevention Program?  
33 515 *Health Affairs* 2012;31(1):67–75.  
34  
35 516 27. **Requirements for CDC Recognition| Diabetes | NDPP.** 2018. Available at:  
36 517 <https://www.cdc.gov/diabetes/prevention/lifestyle-program/requirements.html>. Accessed December  
37 518 6, 2018.  
38  
39 519 28. **Ivankova NV.** Using Mixed-Methods Sequential Explanatory Design: From Theory to Practice.  
40 520 *Field Methods* 2006;18(1):3–20.  
41  
42 521 29. **Guetterman TC, Fethers MD, Creswell JW.** Integrating Quantitative and Qualitative Results in  
43 522 Health Science Mixed Methods Research Through Joint Displays. *Ann Fam Med* 2015;13(6):554–  
44 523 561.  
45  
46 524 30. **Plano Clark VL, Schumacher K, West C, Edrington J, Dunn LB, Harzstark A, Melisko M,**  
47 525 **Rabow MW, Swift PS, Miaskowski C.** Practices for Embedding an Interpretive Qualitative  
48 526 Approach Within a Randomized Clinical Trial. *Journal of Mixed Methods Research* 2013;7(3):219–  
49 527 242.  
50  
51 528 31. **U.S. Census Bureau QuickFacts: Michigan.** Available at: <https://www.census.gov/quickfacts/MI>.  
52 529 Accessed December 5, 2019.  
53  
54  
55  
56  
57  
58  
59  
60



- 1  
2  
3 530 32. **Defining Adult Overweight and Obesity | Overweight & Obesity | CDC.** Available at:  
4 531 <https://www.cdc.gov/obesity/adult/defining.html>. Accessed February 7, 2017.
- 5  
6 532 33. **REDCap.** Available at: <https://www.project-redcap.org/>. Accessed June 19, 2017.
- 7  
8 533 34. **Strecher VJ, McEvoy DeVellis B, Becker MH, Rosenstock IM.** The Role of Self-Efficacy in  
9 534 Achieving Health Behavior Change. *Health Education Quarterly* 1986;13(1):73–92.
- 10  
11 535 35. **Eldridge SM, Chan CL, Campbell MJ, Bond CM, Hopewell S, Thabane L, Lancaster GA.**  
12 536 CONSORT 2010 statement: extension to randomised pilot and feasibility trials. *Pilot and*  
13 537 *Feasibility Studies* 2016;2(1):64.
- 14  
15 538 36. **Thabane L, Ma J, Chu R, Cheng J, Ismaila A, Rios LP, Robson R, Thabane M, Giangregorio**  
16 539 **L, Goldsmith CH.** A tutorial on pilot studies: the what, why and how. *BMC Med Res Methodol*  
17 540 2010;10:1.
- 18  
19 541 37. **Moore CG, Carter RE, Nietert PJ, Stewart PW.** Recommendations for Planning Pilot Studies in  
20 542 Clinical and Translational Research. *Clin Transl Sci* 2011;4(5):332–337.
- 21  
22 543 38. **Pilot Studies: Common Uses and Misuses.** *NCCIH* 2017. Available at:  
23 544 [https://nccih.nih.gov/grants/whatnccihfunds/pilot\\_studies](https://nccih.nih.gov/grants/whatnccihfunds/pilot_studies). Accessed February 19, 2019.
- 24  
25 545 39. **Hsieh H-F, Shannon SE.** Three Approaches to Qualitative Content Analysis. *Qual Health Res*  
26 546 2005;15(9):1277–1288.
- 27  
28 547 40. **Griauzde DH, Kullgren JT, Liestenfeltz B, Richardson C, Heisler M.** A mobile phone-based  
29 548 program to promote healthy behaviors among adults with prediabetes: study protocol for a pilot  
30 549 randomized controlled trial. *Pilot Feasibility Stud* 2018;4:48.
- 31  
32 550 41. **Aziz Z, Absetz P, Oldroyd J, Pronk NP, Oldenburg B.** A systematic review of real-world  
33 551 diabetes prevention programs: learnings from the last 15 years. *Implementation Science* 2015;10:1–  
34 552 17.
- 35  
36 553 42. **Metzgar CJ, Preston AG, Miller DL, Nickols-Richardson SM.** Facilitators and barriers to weight  
37 554 loss and weight loss maintenance: a qualitative exploration. *J Hum Nutr Diet* 2015;28(6):593–603.
- 38  
39 555 43. **The Diet and 15-Year Death Rate in the Seven Countries Study.** *Am J Epidemiol*  
40 556 2017;185(11):1130–1142.
- 41  
42 557 44. **Hooper L, Martin N, Abdelhamid A, Smith GD.** Reduction in saturated fat intake for  
43 558 cardiovascular disease. *Cochrane Database of Systematic Reviews* 2015;(6).  
44 559 doi:10.1002/14651858.CD011737.
- 45  
46 560 45. **Howard BV, Horn LV, Hsia J, Manson JE, Stefanick ML, Wassertheil-Smoller S, Kuller LH,**  
47 561 **LaCroix AZ, Langer RD, Lasser NL, Lewis CE, Limacher MC, Margolis KL, Mysiw WJ,**  
48 562 **Ockene JK, Parker LM, Perri MG, Phillips L, Prentice RL, Robbins J, Rossouw JE, Sarto**  
49 563 **GE, Schatz IJ, Snetselaar LG, Stevens VJ, Tinker LF, Trevisan M, Vitolins MZ, Anderson**  
50 564 **GL, Assaf AR, Bassford T, Beresford SAA, Black HR, Brunner RL, Brzyski RG, Caan B,**  
51 565 **Chlebowski RT, Gass M, Granek I, Greenland P, Hays J, Heber D, Heiss G, Hendrix SL,**  
52 566 **Hubbell FA, Johnson KC, Kotchen JM.** Low-Fat Dietary Pattern and Risk of Cardiovascular

- 1  
2  
3 567 Disease: The Women's Health Initiative Randomized Controlled Dietary Modification Trial. *JAMA*  
4 568 2006;295(6):655–666.  
5  
6 569 46. **Association AD.** 5. Lifestyle Management: Standards of Medical Care in Diabetes—2019. *Diabetes*  
7 570 *Care* 2019;42(Supplement 1):S46–S60.  
8  
9 571 47. **Management of Obesity and Overweight (OBE) (2014) - VA/DoD Clinical Practice Guidelines.**  
10 572 Available at: <https://www.healthquality.va.gov/guidelines/cd/obesity/index.asp>. Accessed June 25,  
11 573 2019.  
12  
13 574 48. **Edwards CM, Cusi K.** Prediabetes: A Worldwide Epidemic. *Endocrinol. Metab. Clin. North Am.*  
14 575 2016;45(4):751–764.  
15  
16 576 49. **Xie F, Chan JC, Ma RC.** Precision medicine in diabetes prevention, classification and  
17 577 management. *Journal of Diabetes Investigation* 0(0). doi:10.1111/jdi.12830.  
18  
19 578 50. **Yanovski SZ, Yanovski JA.** Viewpoint: Toward Precision Approaches for the Prevention and  
20 579 Treatment of Obesity. *JAMA* 2018;319(3):223–224.  
21  
22  
23 580  
24  
25 581

582

## 583 TABLES

**Table 1. Baseline characteristics**

|                                           | All participants<br>(n=21) | Program completers <sup>1</sup><br>(n=15) | Semi-structured<br>interviewees (n=14) |
|-------------------------------------------|----------------------------|-------------------------------------------|----------------------------------------|
| Mean age in years, mean (SD)              | 58.9 (11.0)                | 60.5 (10.2)                               | 58.7 (9.4)                             |
| Male, n (%)                               | 12 (57.1)                  | 8 (53.3)                                  | 6 (42.9)                               |
| White, n (%)                              | 18 (85.7)                  | 13 (86.7)                                 | 12 (85.7)                              |
| Education > high school, n (%)            | 17 (85.0)                  | 12 (80.0)                                 | 13 (92.9)                              |
| Married / partnered, n (%)                | 15 (71.4)                  | 12 (80.0)                                 | 10 (71.4)                              |
| Mean BMI in kg/m <sup>2</sup> , mean (SD) | 34.1 (5.4)                 | 33.9 (4.2)                                | 32.7 (3.1)                             |
| Baseline HbA1c, mean (SD)                 | 5.9 (0.2)                  | 6.0 (0.2)                                 | 5.9 (0.2)                              |

<sup>1</sup>Defined as having completed the 12-month survey.

584

**Table 2. 6-month and 12-month results among all participants (n=21) and 12-month survey completers (n=15).**

| Outcomes<br>(mean (SD) or N (%)) | 6 months   |                      | 12 months  |                                   |
|----------------------------------|------------|----------------------|------------|-----------------------------------|
|                                  | All (n=21) | Completers<br>(n=15) | All (n=21) | Completers <sup>1</sup><br>(n=15) |
| Weight change in kg              | -4.3 (4.8) | -6.0 (4.7)           | -4.9 (5.8) | -6.1 (6.1)                        |
| Percent weight change            | 4.5 (5.0)  | 6.2 (4.8)            | 5.2 (6.0)  | 6.4 (6.4)                         |
| At least 5% weight loss          | 9 (42.9)   | 9 (60.0)             | 8 (38.1)   | 7 (46.7)                          |
| At least 10% weight loss         | 3 (14.2)   | 3 (20.0)             | 6 (27.3)   | 5 (33.3)                          |
| HbA1c change                     | -0.1 (0.2) | -0.2 (0.2)           | 0.06 (0.3) | 0.04 (0.4)                        |

<sup>1</sup>Defined as having completed the 12-month survey.

585

**Table 3. Key themes and representative quotes stratified by percent body weight loss.**

| Key Theme                                      | Representative Quotes                                                                                                                                                                                                                                                                                                                                                                      |
|------------------------------------------------|--------------------------------------------------------------------------------------------------------------------------------------------------------------------------------------------------------------------------------------------------------------------------------------------------------------------------------------------------------------------------------------------|
| <b>≥5% body weight loss at 12 months (n=7)</b> |                                                                                                                                                                                                                                                                                                                                                                                            |
| Enjoyment of low-carbohydrate foods            | “[I’m eating] all the cheese and the meat and the vegetables I’m allowed. I’m enjoying all of it. And I found snacks like sugarless jello...beef sticks, salami with cheese...and I’m really enjoying it...If I have cake it’ll be here and there, like for a party, but I know that I can get right back on this diet in the next day.”<br><i>-14.5 kg (18% body weight) at 12 months</i> |
| Diminished hunger and cravings                 | “I don’t have cravings. I like the fact that I’m not craving food and thinking about food all the time.”<br><i>-8.6 kg (9.5% body weight) at 12 months</i>                                                                                                                                                                                                                                 |
| Health benefits beyond weight loss             | “By losing the weight, I feel more active. It seems like my joints don’t hurt as bad.”<br><i>-14.5 kg (14% body weight) at 12 months</i>                                                                                                                                                                                                                                                   |

| <b>≤5% body weight loss at 12 months (n=6)</b> |                                                                                                                                                                                                                                                                                                                                                                                                                          |
|------------------------------------------------|--------------------------------------------------------------------------------------------------------------------------------------------------------------------------------------------------------------------------------------------------------------------------------------------------------------------------------------------------------------------------------------------------------------------------|
| Difficulty giving up high-carbohydrate foods   | <p>“The hardest thing is avoiding food that I like or love, like breads and mashed potatoes and potato chips and pasta and going out to dinner and having a nice, big juicy hamburger on a nice bun. Just taking the bun off, not having pasta, not having mashed potatoes, I miss that. But, if I see the weight loss keep going, I'm okay to tolerate that.”</p> <p><i>-3.6 kg (3.4% body weight) at 12 months</i></p> |
| Lack of social support                         | <p>“It's very hard sometimes when you're traveling with friends, going on road trips, going to restaurants, watching everybody eat, the high carbohydrate food, being of a Mediterranean descent with pastas and stuff like that, spaghetti and pizzas and noodles, it's very hard to adhere to it at times.”</p> <p><i>-2.2 kg (2.3% body weight) at 12 months</i></p>                                                  |
| Trouble pre-planning meals                     | <p>“I think just like with any sort of food awareness...there's time involved, and it's just hard to pre-plan and make meals that would benefit me and that my kids would like.”</p> <p><i>-0.63 kg (0.6% body weight) at 12 months</i></p>                                                                                                                                                                              |

586

587

1  
2  
3 588

4  
5 589

6  
7 590

8  
9  
10  
11  
12  
13  
14  
15  
16  
17  
18  
19  
20  
21  
22  
23  
24  
25  
26  
27  
28  
29  
30  
31  
32  
33  
34  
35  
36  
37  
38  
39  
40  
41  
42  
43  
44  
45  
46  
47  
48  
49  
50  
51  
52  
53  
54  
55  
56  
57  
58  
59  
60

For peer review only

## Appendix 1. Quiz to assess LC-DPP teacher's knowledge about low-carbohydrate meal plan

Please choose all answers that are correct (by bolding or starring the right answer or by e-mailing me your choices in plain text). More than 1 answer will be correct.

1. Which of these fast-food restaurants reliably have standard low-carb options:
  - a. Jimmy John's
  - b. Chipotle
  - c. Chinese restaurants
2. When making something low-carb at a restaurant make sure to consider:
  - a. asking for extra butter pats or low-carb sides if they aren't serving you enough fat
  - b. asking for lettuce-wrapped sandwiches and burgers
  - c. checking for how salty the dressings are
3. Some low-carb flours include:
  - a. almond flour
  - b. cauliflower
  - c. coconut flour
  - d. rice flour
4. When someone is following a low-carb diet, we want their weight loss to be:
  - a. more than 5 pounds a week at first
  - b. less than 5 pounds a week at first
  - c. generally we don't care how fast or slow their weight loss is, although if they're not at their ideal weight and they're still not losing weight, it's time to troubleshoot
5. Low-carb diets tend to make people:
  - a. hungrier and less thirsty
  - b. hungrier and more thirsty
  - c. less hungry and less thirsty
  - d. less hungry and more thirsty
6. If someone is constipated, they could try:
  - a. taking a magnesium supplement
  - b. drinking more water
  - c. adding in more foods with potassium
7. When attending a party, how can someone prepare to stick to their low-carb meal plan?
  - a. bring something low-carb
  - b. eat before hand so they don't arrive very hungry
  - c. give themselves a non low-carb treat at the party
  - d. pre-think how they will deal with peer pressure at the party
8. What low-carb foods can often be found at convenience or corner stores?
  - a. salted nuts (ideally lower carb like almonds, walnuts, and pecans and not higher carb like cashews and pistachios)
  - b. hard boiled eggs
  - c. string cheese
  - d. pork rinds (make sure they don't include trans fats)

## 9. Net carbs:

- a. are total grams of carbohydrates minus grams of fiber
- b. are also called non-fiber grams of carbohydrates
- c. do not include naturally present sugars
- d. should be no more than about 20-35 grams a day for someone following a very low-carbohydrate diet

## 10. A very low-carb diet typically:

- a. includes fruit other than berries
- b. increases blood pressure
- c. includes saturated fat from animal and plant sources

## 11. Rare side effects of a low-carb diet include:

- a. insomnia
- b. hair loss
- c. more cavities
- d. diarrhea

## 12. A participant is facing a weight-loss plateau. What are some possible causes?

- a. eating too many calories
- b. consuming foods with artificial sweeteners most days
- c. poor sleep
- d. eating more than 40 grams of protein at once

## 13. A participant says they're feeling dizzy or woozy. What are some possible causes?

- a. Insufficient intake of water and salt
- b. Perceived or actual hypoglycemia
- c. Low blood pressure

## 14. A participant is worried about following a low-carb diet since they are very physically active and don't want it to hurt their performance. How might you respond?

- a. Weight loss on a low-carb diet is typically muscle-sparing, which can help preserve athletic performance
- b. Lots of athletes, especially those who do sports that require endurance, do quite well on a low-carb diet, since it prevents "hitting the wall" or "bonking."
- c. They should not exercise heavily while following a very low-carbohydrate diet.

## 15. What should participants know about alcohol?

- a. When on a low-carb diet, participants may get drunk more easily from less alcohol.
- b. Unsweetened and unflavored liquor has 0g net carbs.
- c. Alcohol may decrease fat burning and weight loss

## 16. What types of fats are preferred on a low-carb diet?

- a. Lard with partially hydrogenated oils added
- b. Coconut oil
- c. Olive oil
- d. Butter

## 17. Which of the following are true about sugar alcohols?

- a. Calculate net carbs by only counting half of the grams of sugar alcohols
- b. They can cause intestinal distress and flatulence

- 1  
2  
3 c. Erythritol is often considered to have the least amount of influence on blood sugar of all  
4 the sugar alcohols  
5 d. They are an essential part of a low-carb diet.  
6

7  
8 18. A participant is complaining of intestinal distress. What might be causing it?

- 9 a. Cauliflower  
10 b. Sugar-free gum  
11 c. Erythritol  
12 d. Broccoli  
13

14 19. Which of these foods are potentially problematic on a low-carb diet because of their carb  
15 content?

- 16 a. Starchy vegetables like carrots  
17 b. Butter  
18 c. Chocolate with a cacao content less than 85%  
19 d. Bacon and processed meats with added sugars  
20

21 20. Which of the following typically improve when someone follows a low-carb meal plan?

- 22 a. triglycerides  
23 b. weight  
24 c. HbA1c  
25  
26  
27  
28  
29  
30  
31  
32  
33  
34  
35  
36  
37  
38  
39  
40  
41  
42  
43  
44  
45  
46  
47  
48  
49  
50  
51  
52  
53  
54  
55  
56  
57  
58  
59  
60



| Amount Per Serving        |                                |                       |
|---------------------------|--------------------------------|-----------------------|
| <b>Calories</b>           | 180                            | Calories from Fat 100 |
|                           | Calories from Saturated Fat 15 |                       |
| % Daily Value*            |                                |                       |
| <b>Total Fat</b>          | 11g                            | <b>17 %</b>           |
| Saturated Fat             | 2g                             | <b>9 %</b>            |
| Trans Fat                 | 0g                             |                       |
| Polyunsaturated Fat       | 3.5g                           |                       |
| Monounsaturated Fat       | 5g                             |                       |
| <b>Cholesterol</b>        | 0mg                            | <b>0 %</b>            |
| <b>Sodium</b>             | 110mg                          | <b>5 %</b>            |
| <b>Potassium</b>          | 150mg                          | <b>4 %</b>            |
| <b>Total Carbohydrate</b> | 17g                            | <b>6 %</b>            |
| Dietary Fiber             | 14g                            | <b>54 %</b>           |
| Sugars                    | 2g                             |                       |

21. How many net grams of carbohydrates are in the food to the left?

- 17
- 14
- 3
- 2

| Amount per serving        |                 |
|---------------------------|-----------------|
| <b>Calories</b>           | <b>230</b>      |
| % Daily Value*            |                 |
| <b>Total Fat</b>          | 8g <b>10%</b>   |
| Saturated Fat             | 1g <b>5%</b>    |
| Trans Fat                 | 0g              |
| <b>Cholesterol</b>        | 0mg <b>0%</b>   |
| <b>Sodium</b>             | 160mg <b>7%</b> |
| <b>Total Carbohydrate</b> | 37g <b>13%</b>  |
| Dietary Fiber             | 4g <b>14%</b>   |
| Total Sugars              | 12g             |
| Includes 10g Added Sugars | <b>20%</b>      |
| <b>Protein</b>            | 3g              |

22. How many net grams of carbohydrates are in the food to the left?

- 37
- 34
- 27
- 25

## Low-Carbohydrate Diabetes Prevention Program: 6-month interview guide

### Introduce self

Hello, my name is [name of interviewer].

### Discuss purpose of the interview group

We are interested in understanding your experiences to date with the Low-Carbohydrate Diabetes Prevention Program. We want to understand how the program has changed your diet and physical activity habits, and we want to know your thoughts about what you liked about the program and ways that it could be improved.

I want to encourage you to answer honestly and share any thoughts you may have. There is no right or wrong answer, and you will not be penalized for anything you say. We care about your opinion, so that we can make an even better program that could benefit others.

You will receive a \$20 gift card for participating in this interview.

### Describe how we will assure confidentiality and answer any questions.

I want to take a minute to tell you what happens with the information you provide for us today. I am recording this conversation so that we don't miss any of the comments that you share. People working on this study will be the only ones who will use the interview recordings.

As a reminder, you are not obligated to answer any question you feel uncomfortable responding to, and you are not required to participate. You may leave the interview at any time.

Do you have any questions for me before you review and sign the consent form? (Answer questions and then give consent form).

I'm going to turn on the recorder and we will get started. \*\*\*Turn on recorder\*\*\* The rest of the conversation is being recorded for research purposes.

### Interview

#### General experience

1. Tell me about how the program is going for you so far.
  - a. Tell me more.
  - b. Probe, if needed: what do you like about the program?
    - i. Tell me more.
  - c. Probe, if needed: what, if anything, has been hard or challenging about the program?
  - d. Probe, if needed: Any side effects?
  - e. Tell me more.

#### Diet advice and experience

2. Tell me specifically about how the low-carbohydrate diet is going for you.
  - a. Tell me more.
  - b. Probe, if needed: has anything surprised you about this meal plan?
  - c. Probe, if needed: what, if anything, has been challenging about sticking to this meal plan?
3. Tell me about how your dietary habits and routines have changed with this program, if at all.
  - a. Tell me more.

#### Physical activity advice and experience

4. Tell me about how your physical activity habits and routines have changed with this program, if at all.
  - a. Tell me more.
  - b. Probe, if needed: what, if anything, has been challenging about getting 30 minutes of physical activity, 5 days per week?

#### Motivation and expectations

5. Tell me about your motivation for joining the program?
  - a. Tell me more.
  - b. Probe, if needed: What made you decide to sign up for this program?
6. Before participating in this program, what other ways had you tried to lose weight or to prevent diabetes?
  - a. If participant previously took part in traditional DPP:
    - i. Tell me about how your experience with this low-carbohydrate DPP compares to your prior experience with the traditional low-fat DPP.
7. In what ways has this program met or not met your expectations?
  - a. Tell me more.
  - b. Probe, if needed: has your health improved in the ways that you hoped or expected?
    - i. Tell me more.
  - c. Probe, if needed: has your weight changed in the way you hoped or expected?
    - i. Tell me more.

#### Outcomes and sustainability

8. Tell me about your plans, if any, to stick to this meal plan after the program ends.
  - a. Tell me more.
  - b. If plans to stick with it, ask: why might you stick with the program?
  - c. If plans not to stick with it, as: why not?
  - d. Probe, if needed: what might be some challenges, if any, of sticking to this meal plan after the program ends?

#### Changes to improve the program

*We would like to improve this program to help more people to prevent diabetes.*

- 1
- 2
- 3 9. What, if anything, could have made the low-carbohydrate meal plan easier for you to
- 4 follow?
- 5 a. Tell me more.
- 6
- 7 10. What suggestions do you have to improve this program so far?
- 8 a. Tell me more.
- 9 b. Probe, if needed: what changes would you make to help participants to better
- 10 understand and follow the low-carbohydrate meal plan?
- 11
- 12 11. Are there particular topics that you would like to cover during the last 6 months of the
- 13 program?
- 14 a. Tell me more.
- 15

### 16 Support

17  
18 *We would like to understand how this program supports participants so that we can develop*  
19 *new ways, if needed, to help more people achieve their health and weight loss goals.*  
20

- 21 1. Tell me about the support you received from your lifestyle coach.
- 22 a. Tell me more.
- 23 b. Probe, if needed: was she available, responsive, able to answer questions?
- 24
- 25 2. Tell me about the support you received from your classmates.
- 26 a. Tell me more.
- 27
- 28 3. Was there anyone else such as a friend or family member that provided you with support
- 29 during this program?
- 30 a. Tell me more.
- 31
- 32 4. Did you speak with your healthcare provider about your participation in this program?
- 33 a. If yes: Tell me about what he or she said or advised.
- 34 i. Probe, if needed: Did you feel supported by your healthcare provider?
- 35
- 36 5. Are there ways that this program could better support you in achieving your health
- 37 goals?
- 38 a. Tell me more.

### 39 Conclusion

- 40
- 41 6. Are there any other thoughts or experiences that you would like to share?
- 42

43 I want to thank you again for taking the time to discuss your thoughts and experiences. We will  
44 send you a \$20 gift card in the mail. This concludes today's interview. Thank you and goodbye.

45 \*\*Turn off recorder\*\*  
46  
47  
48  
49  
50  
51  
52  
53  
54  
55  
56  
57  
58  
59  
60
